# Supplementary material for: Calling a Truce: Enterococcus faecalis as a mediator between E. coli and C. albicans during polymicrobial CAUTIs
Source: Research Square preprint supplement (doi:10.21203/rs.3.rs-9545567/v1), 2026-05-07
Supplement: Supplementary file 1 [file 6701c1a1119ea2d477c62ab2.docx]

**
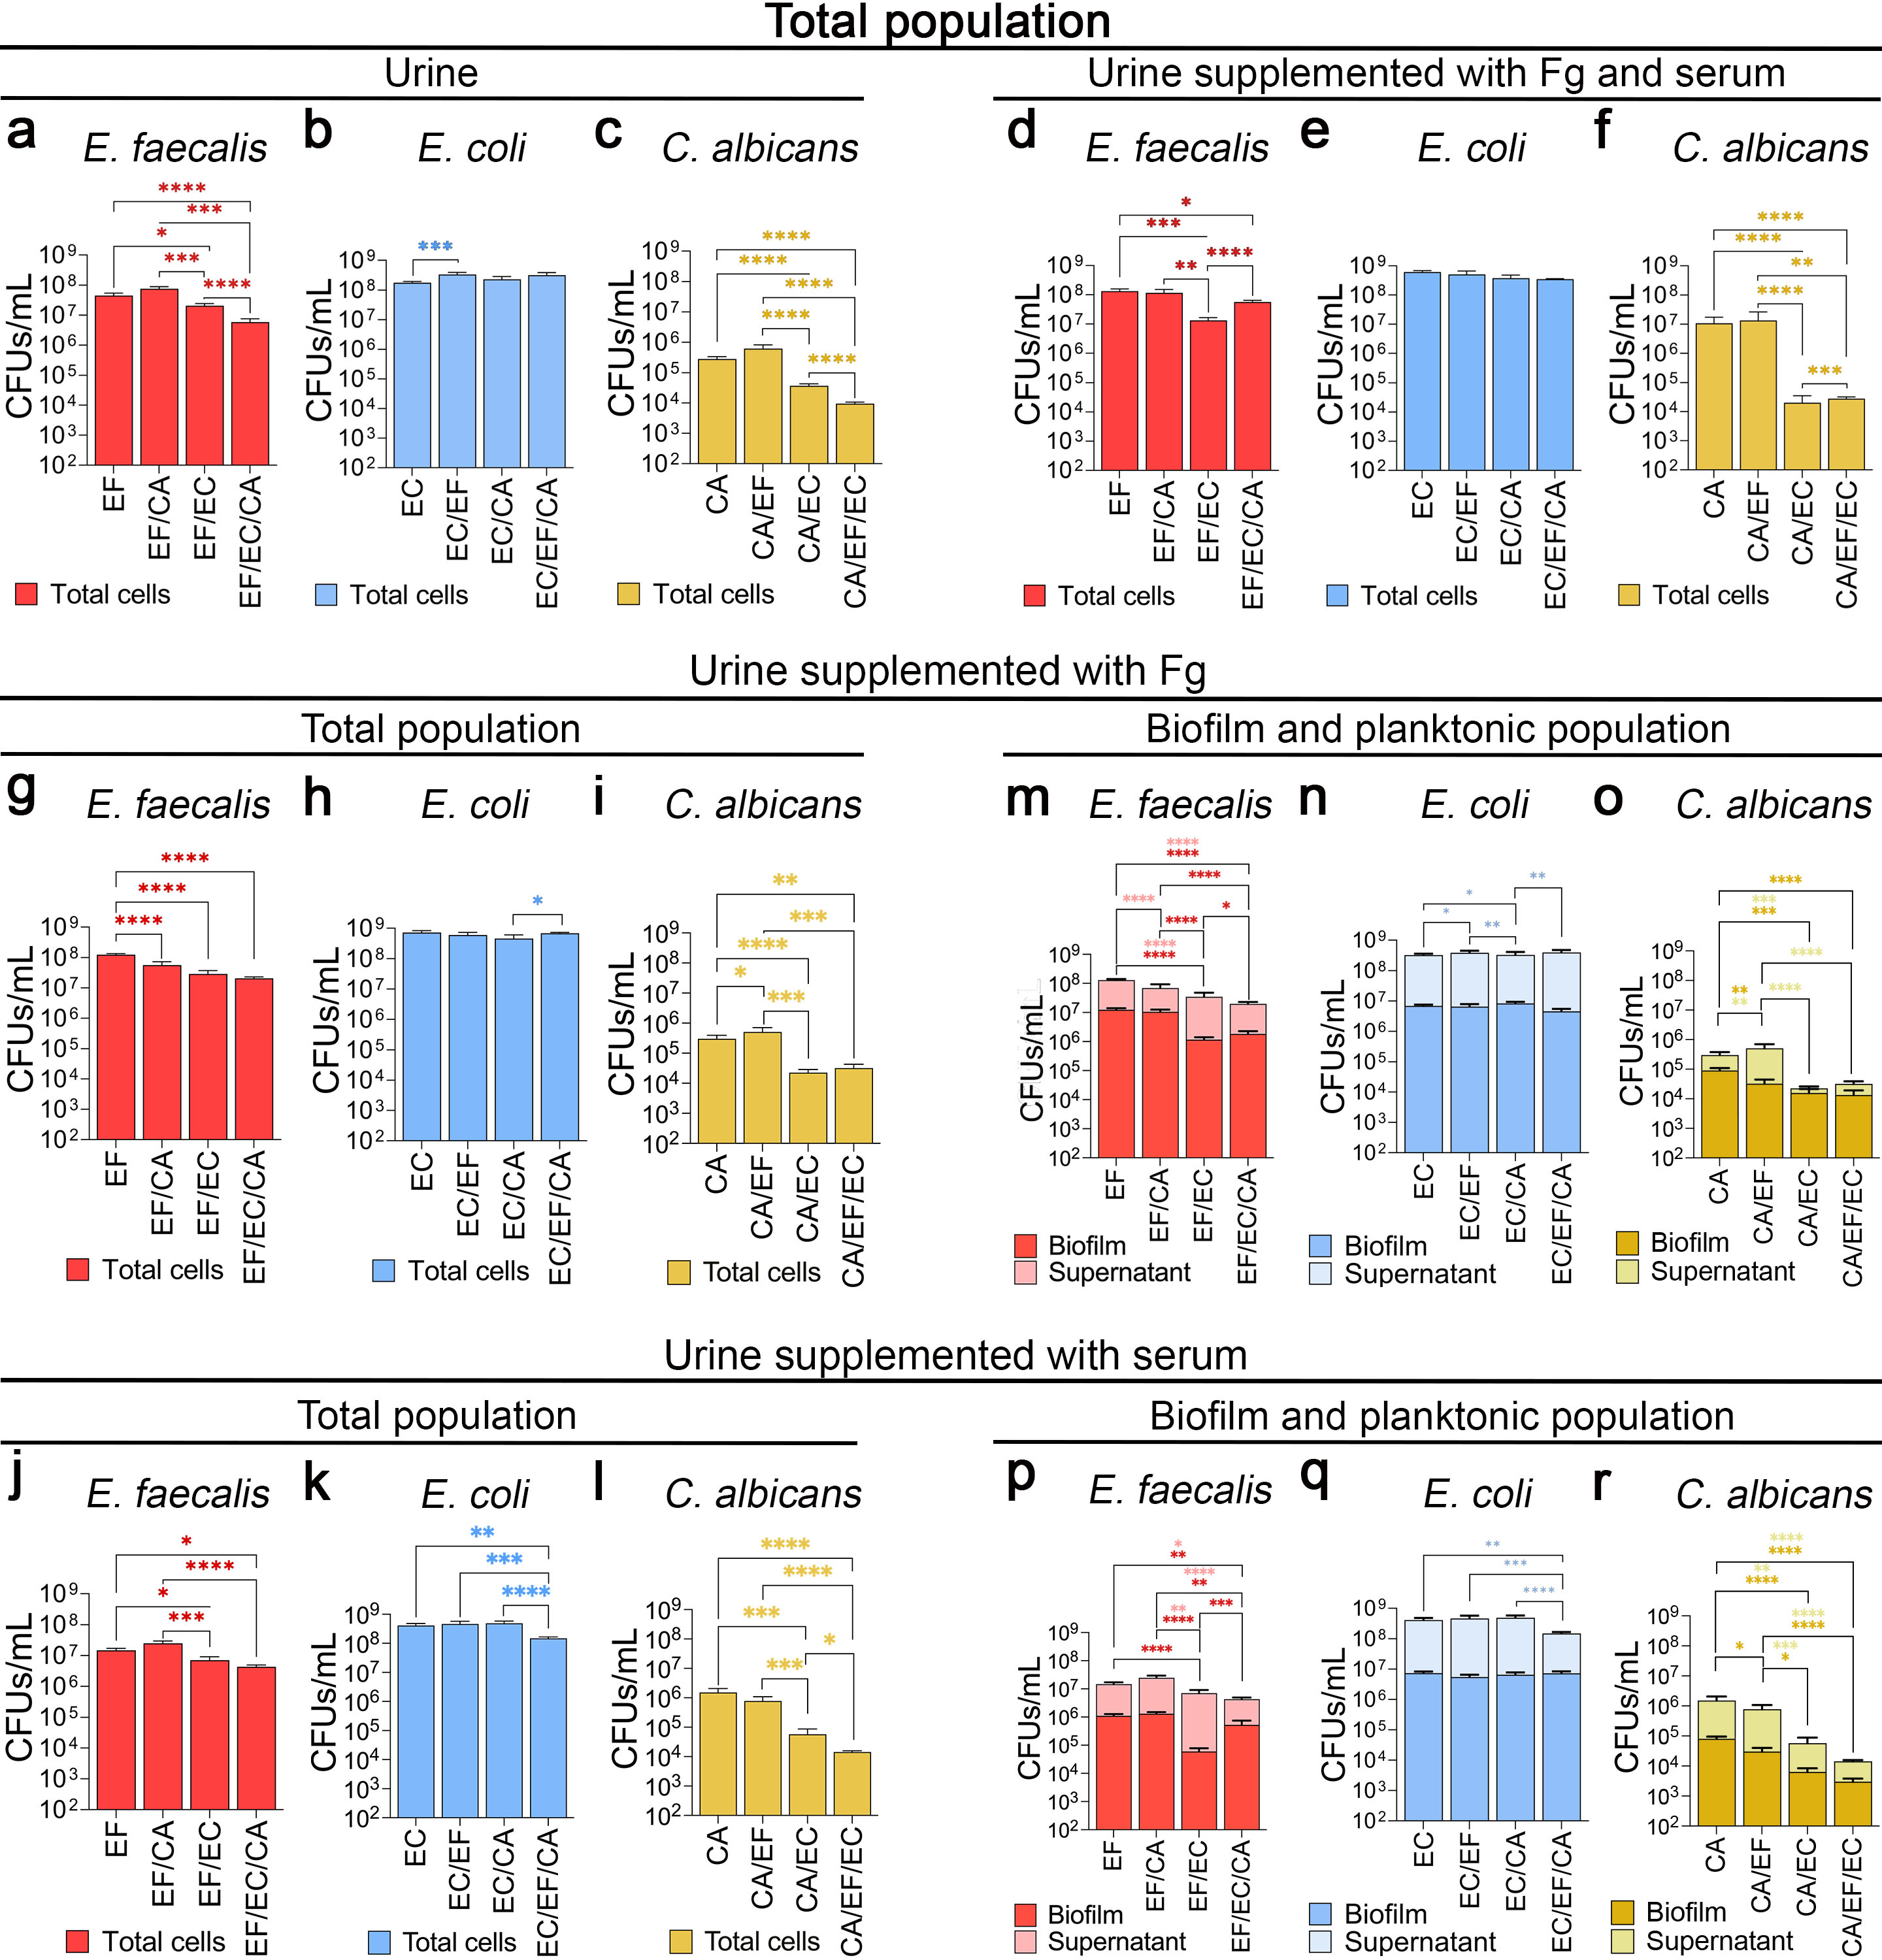
Extended Data Figure 1. *E. coli* inhibits *C. albicans* growth regardless of additional supplementation in the urine at 48 hours.** (**a-f**)Total cells in biofilms and supernatants (planktonic growth) of *E. faecalis* (EF), *E. coli* (EC), and *C. albicans* (CA) grown for 48 hours in human urine (**a-c**)and urine supplemented with Fg and serum (**d-f**). (**g-l**) Biofilm (dark bars) and supernatant (light bars) of *E. faecalis* (EF), *E. coli* (EC), and *C. albicans* (CA) grown for 48 hours in human urine supplemented with Fg (**g-i**) and urine supplemented with serum (**j-l**). (**m-r**) Total cells in biofilms and supernatants (planktonic growth) of *E. faecalis* (EF), *E. coli* (EC), and *C. albicans* (CA) grown for 48 hours in human urine supplemented with Fg (**m-o**)and urine supplemented with Fg and serum (**p-r**). Biofilms were grown on silicone disks covered with 1 mg/mL Fg overnight. Red/pink columns show EF biofilm/supernatant with EC (EF/EC), CA (EF/CA), or both (EF/EC/CA). Blue/light blue graphs show EC biofilm/supernatant with EF (EC/EF), CA (EC/CA), or both (EC/EF/CA). Yellow, light yellow columns show CA biofilm/supernatant with EF (CA/EF), EC (CA/EC), or both (CA/EF/EC). Differences between groups were tested for significance using the Mann-Whitney U test. *, P < 0.05; **, P < 0.005; ***, P < 0.0005; and ****, P < 0.0001.

**
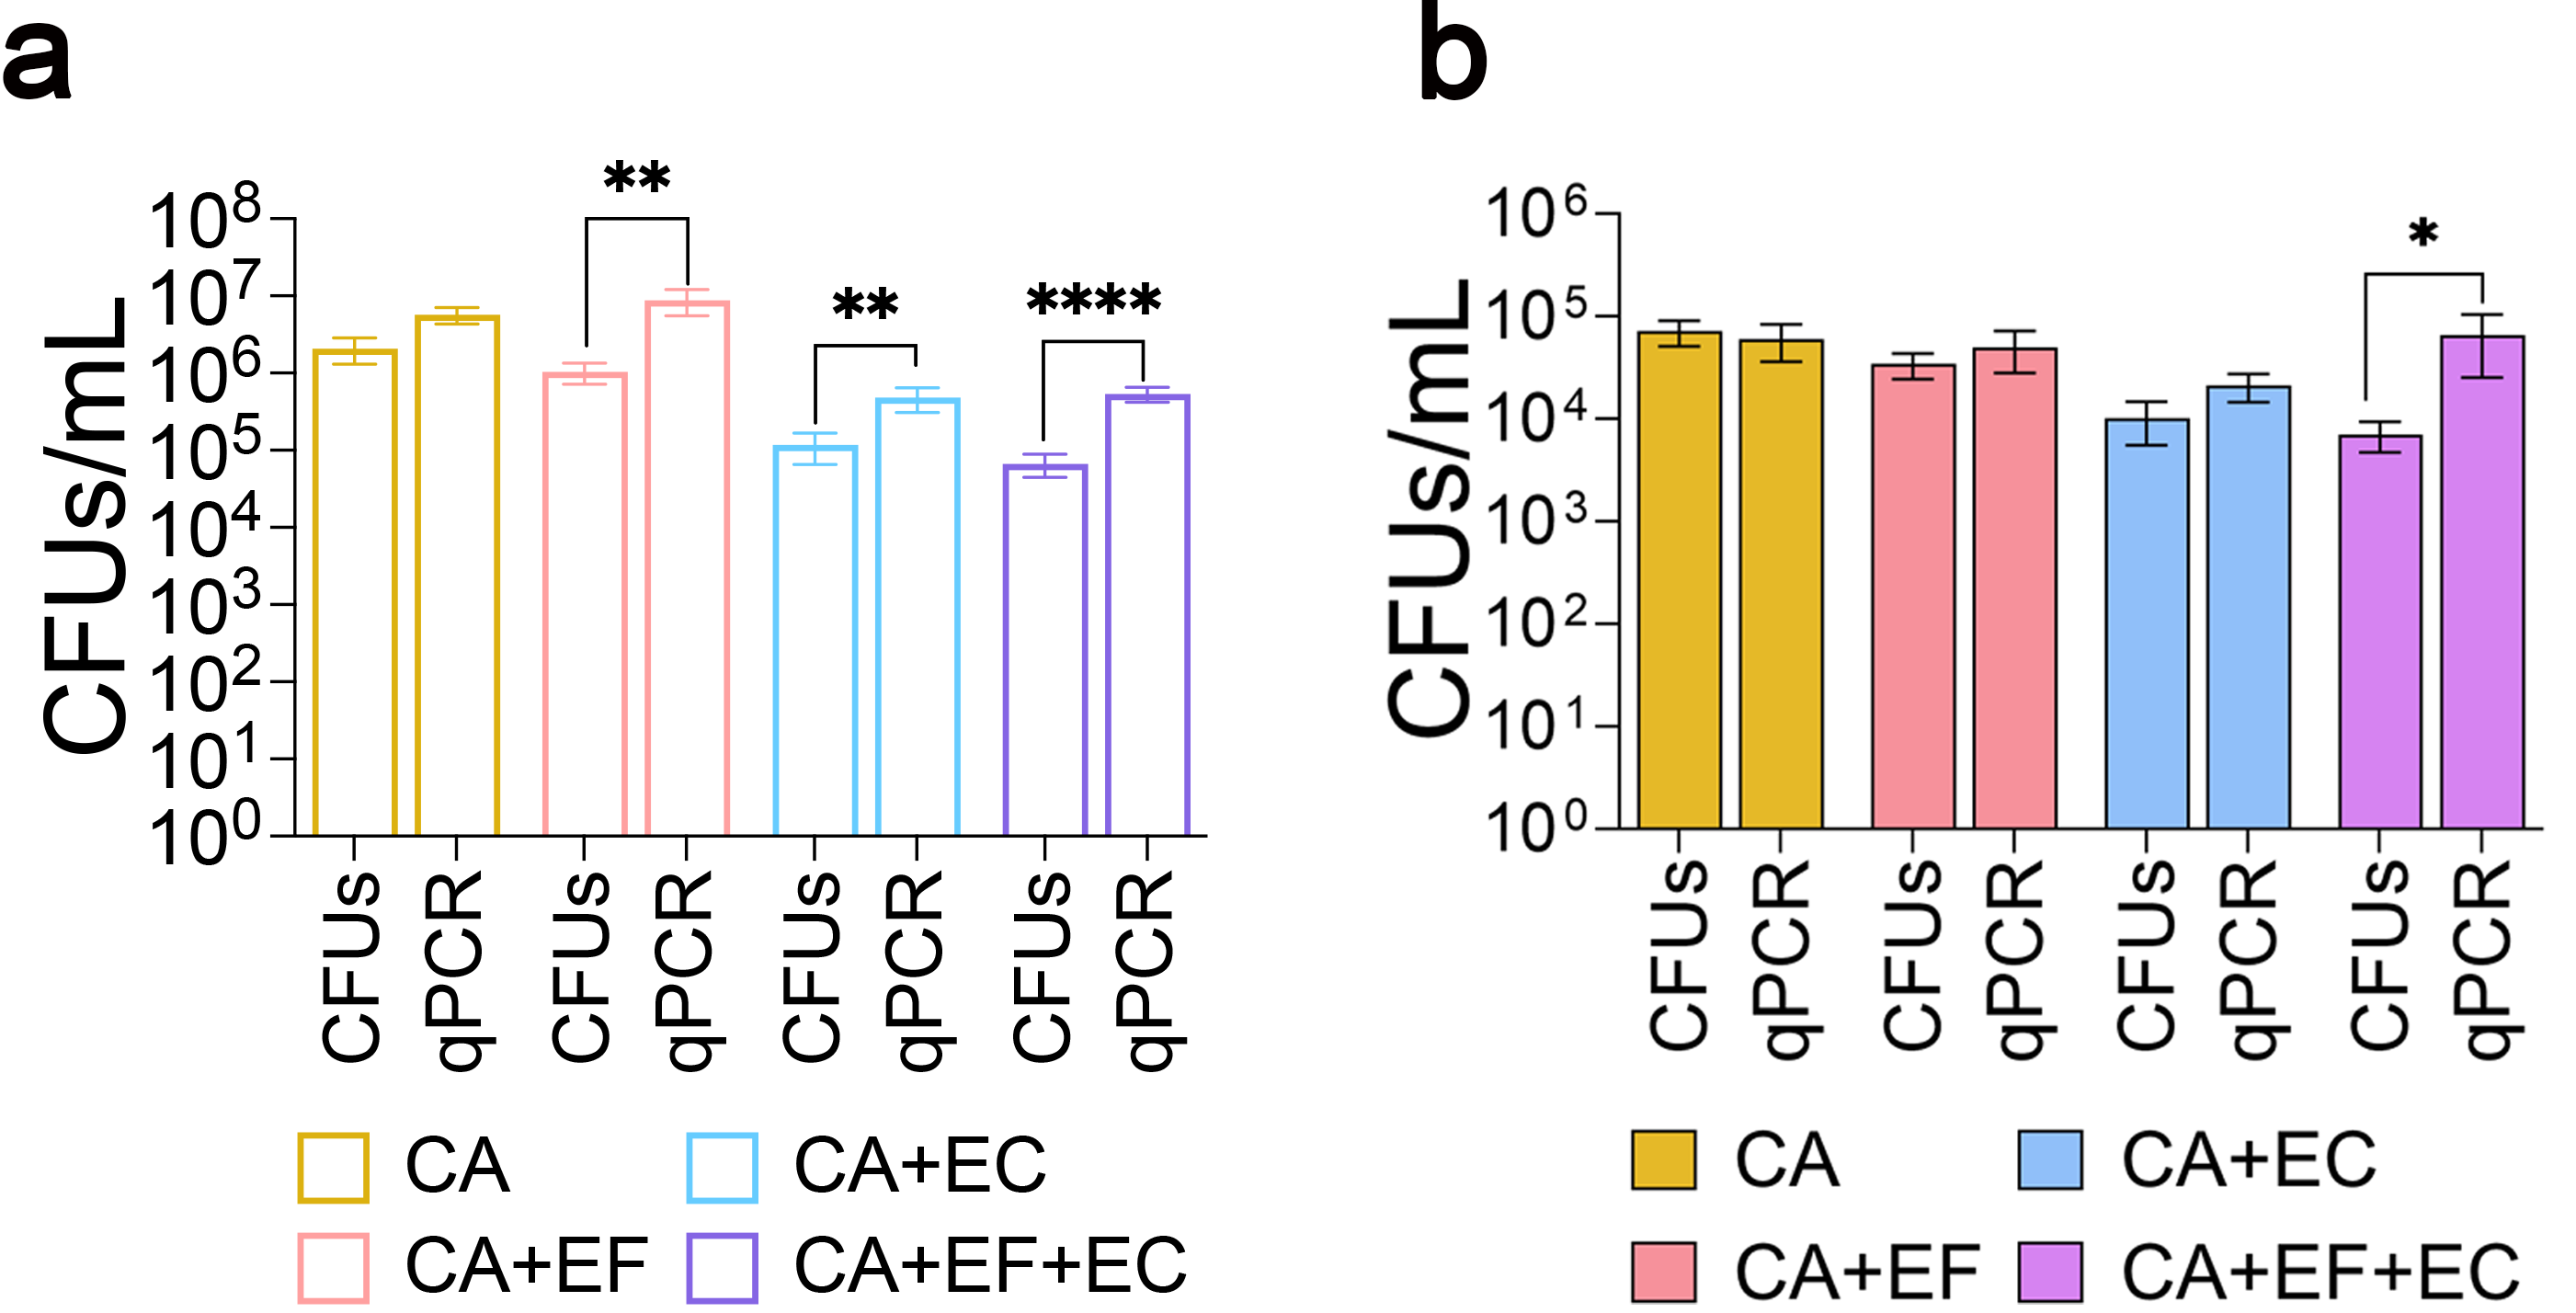
Extended Data Figure 2. *E. faecalis* increases hyphae formation of *C. albicans* in *E. coli-C. albicans* biofilm and planktonic cultures.** (**a,** **b**) Relative CFUs/mL and plated CFUs/mL from biofilm and supernatant grown for 48 hours in human urine. Relative CFUs/mL is based on quantitative PCR using ITS2 as a reference gene and *C. albicans* SC5314 efg1Δ/Δ strain as the standard (see Materials and Methods; Relative Hyphal Count using Imaging and qPCR). Differences between groups were tested for significance using the Mann-Whitney U test. *, P < 0.05; **, P < 0.005; ***, P < 0.0005; and ****, P < 0.0001.


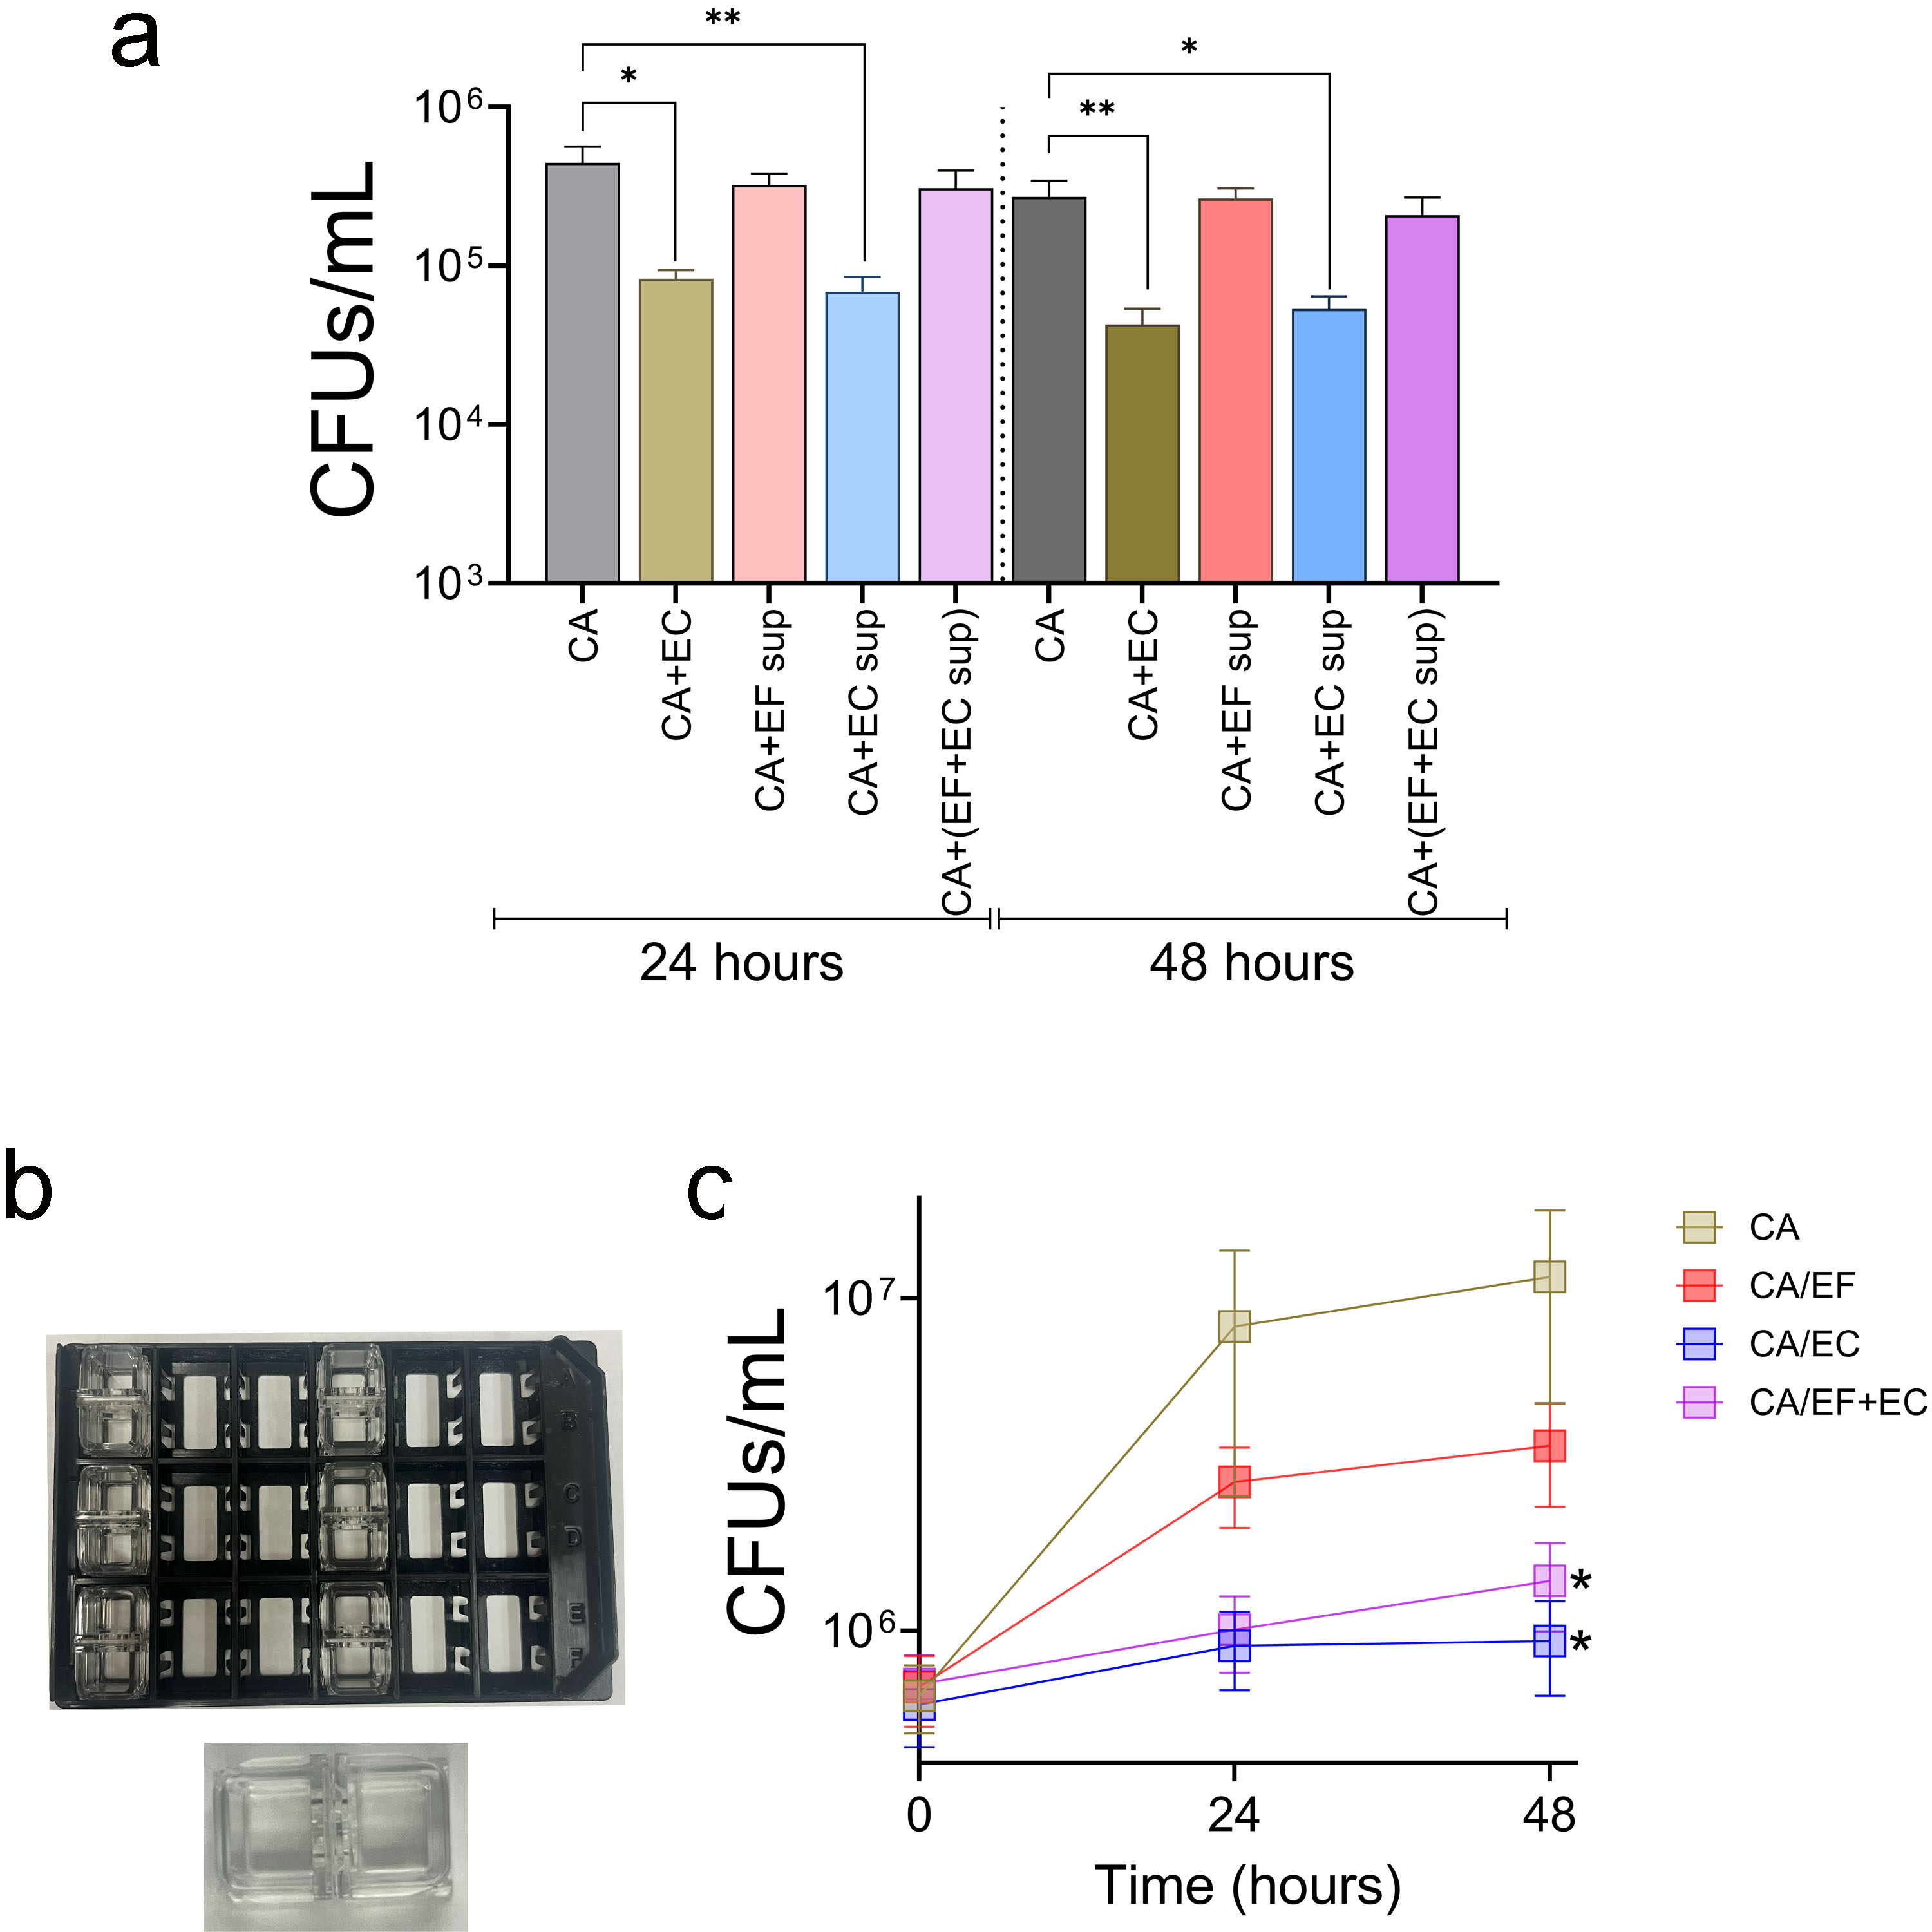


**Extended Data Figure 3. *E. coli* inhibits *C. albicans’* growth and biofilm through contact independent method and the addition of *E. faecalis* is able to rescue *C. albicans’* growth. (a)** For supernatants (sup), *E. faecalis* (EF) and/or *E. coli* (EC) was grown in urine for 48 hours and filter sterilized. Supernatants were concentrated and used to grow *C. albicans* for 24 or 48 hours on silicone disks at 37°C . Fungal CFUs were plated and counted after incubation. **(b)** Cultures were grown in Cerillo’s Duet Co-Culture System in sterilized urine for up to 48 hours at 37°C. Fungal CFUs were plated every 24 hours.

**
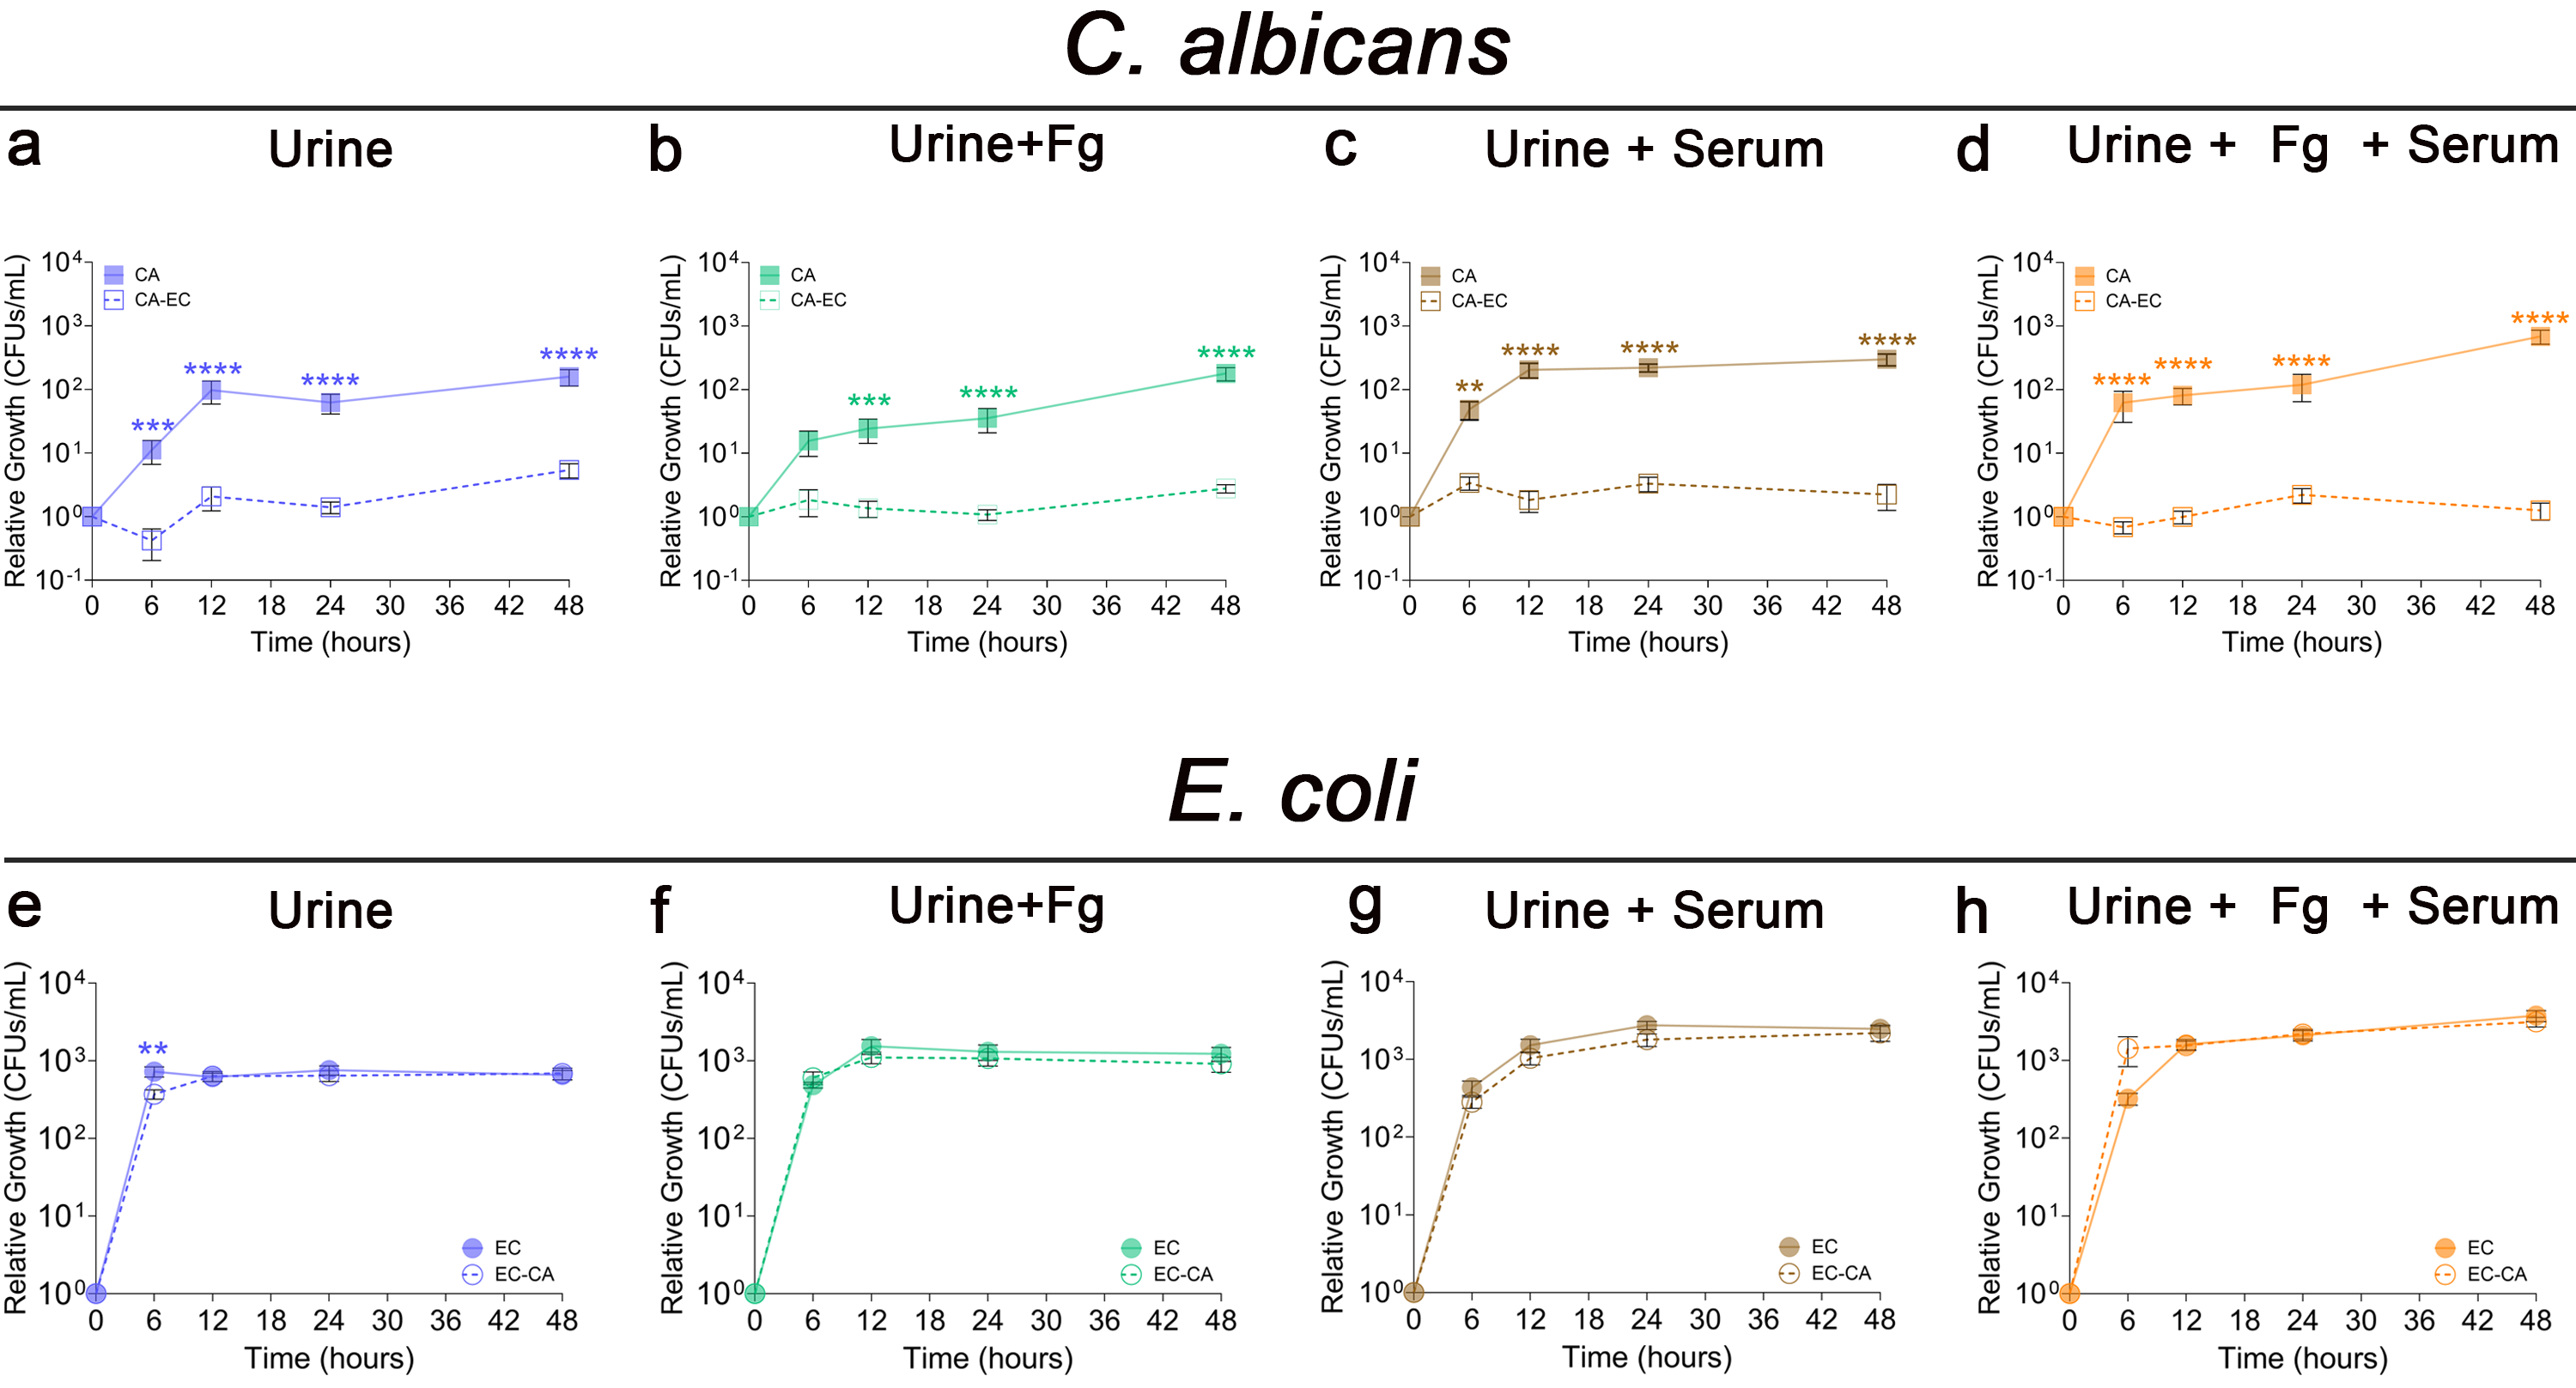
Extended Data Figure 4. Planktonic culture of *C. albicans* is negatively affected by the presence of *E. coli* while *E. coli* is not affected by *C. albicans.* (a-d)** Planktonic fungal CFUs of *C. albicans* with (dash lines) or without (solid lines) *E. coli* in urine (with or without fibrinogen and/or serum supplementations). **(e-h)** Planktonic bacterial CFUs of *E. coli* with (dash lines) or without (solid lines) *C. albicans* in urine (with or without fibrinogen and/or serum supplementations). Cultures were grown in urine (blue), urine + 3 mg/mL Fibrinogen (Fg) (green), urine + 10% human serum (ser) (orange), and urine + Fg + ser (brown) containing microbes at a concentration of ~104 CFUs. Cultures were grown in static condition and CFUs were plated at 0, 6, 12, 24, and 48 hours. The CFUs were standardized relative to the inoculums.


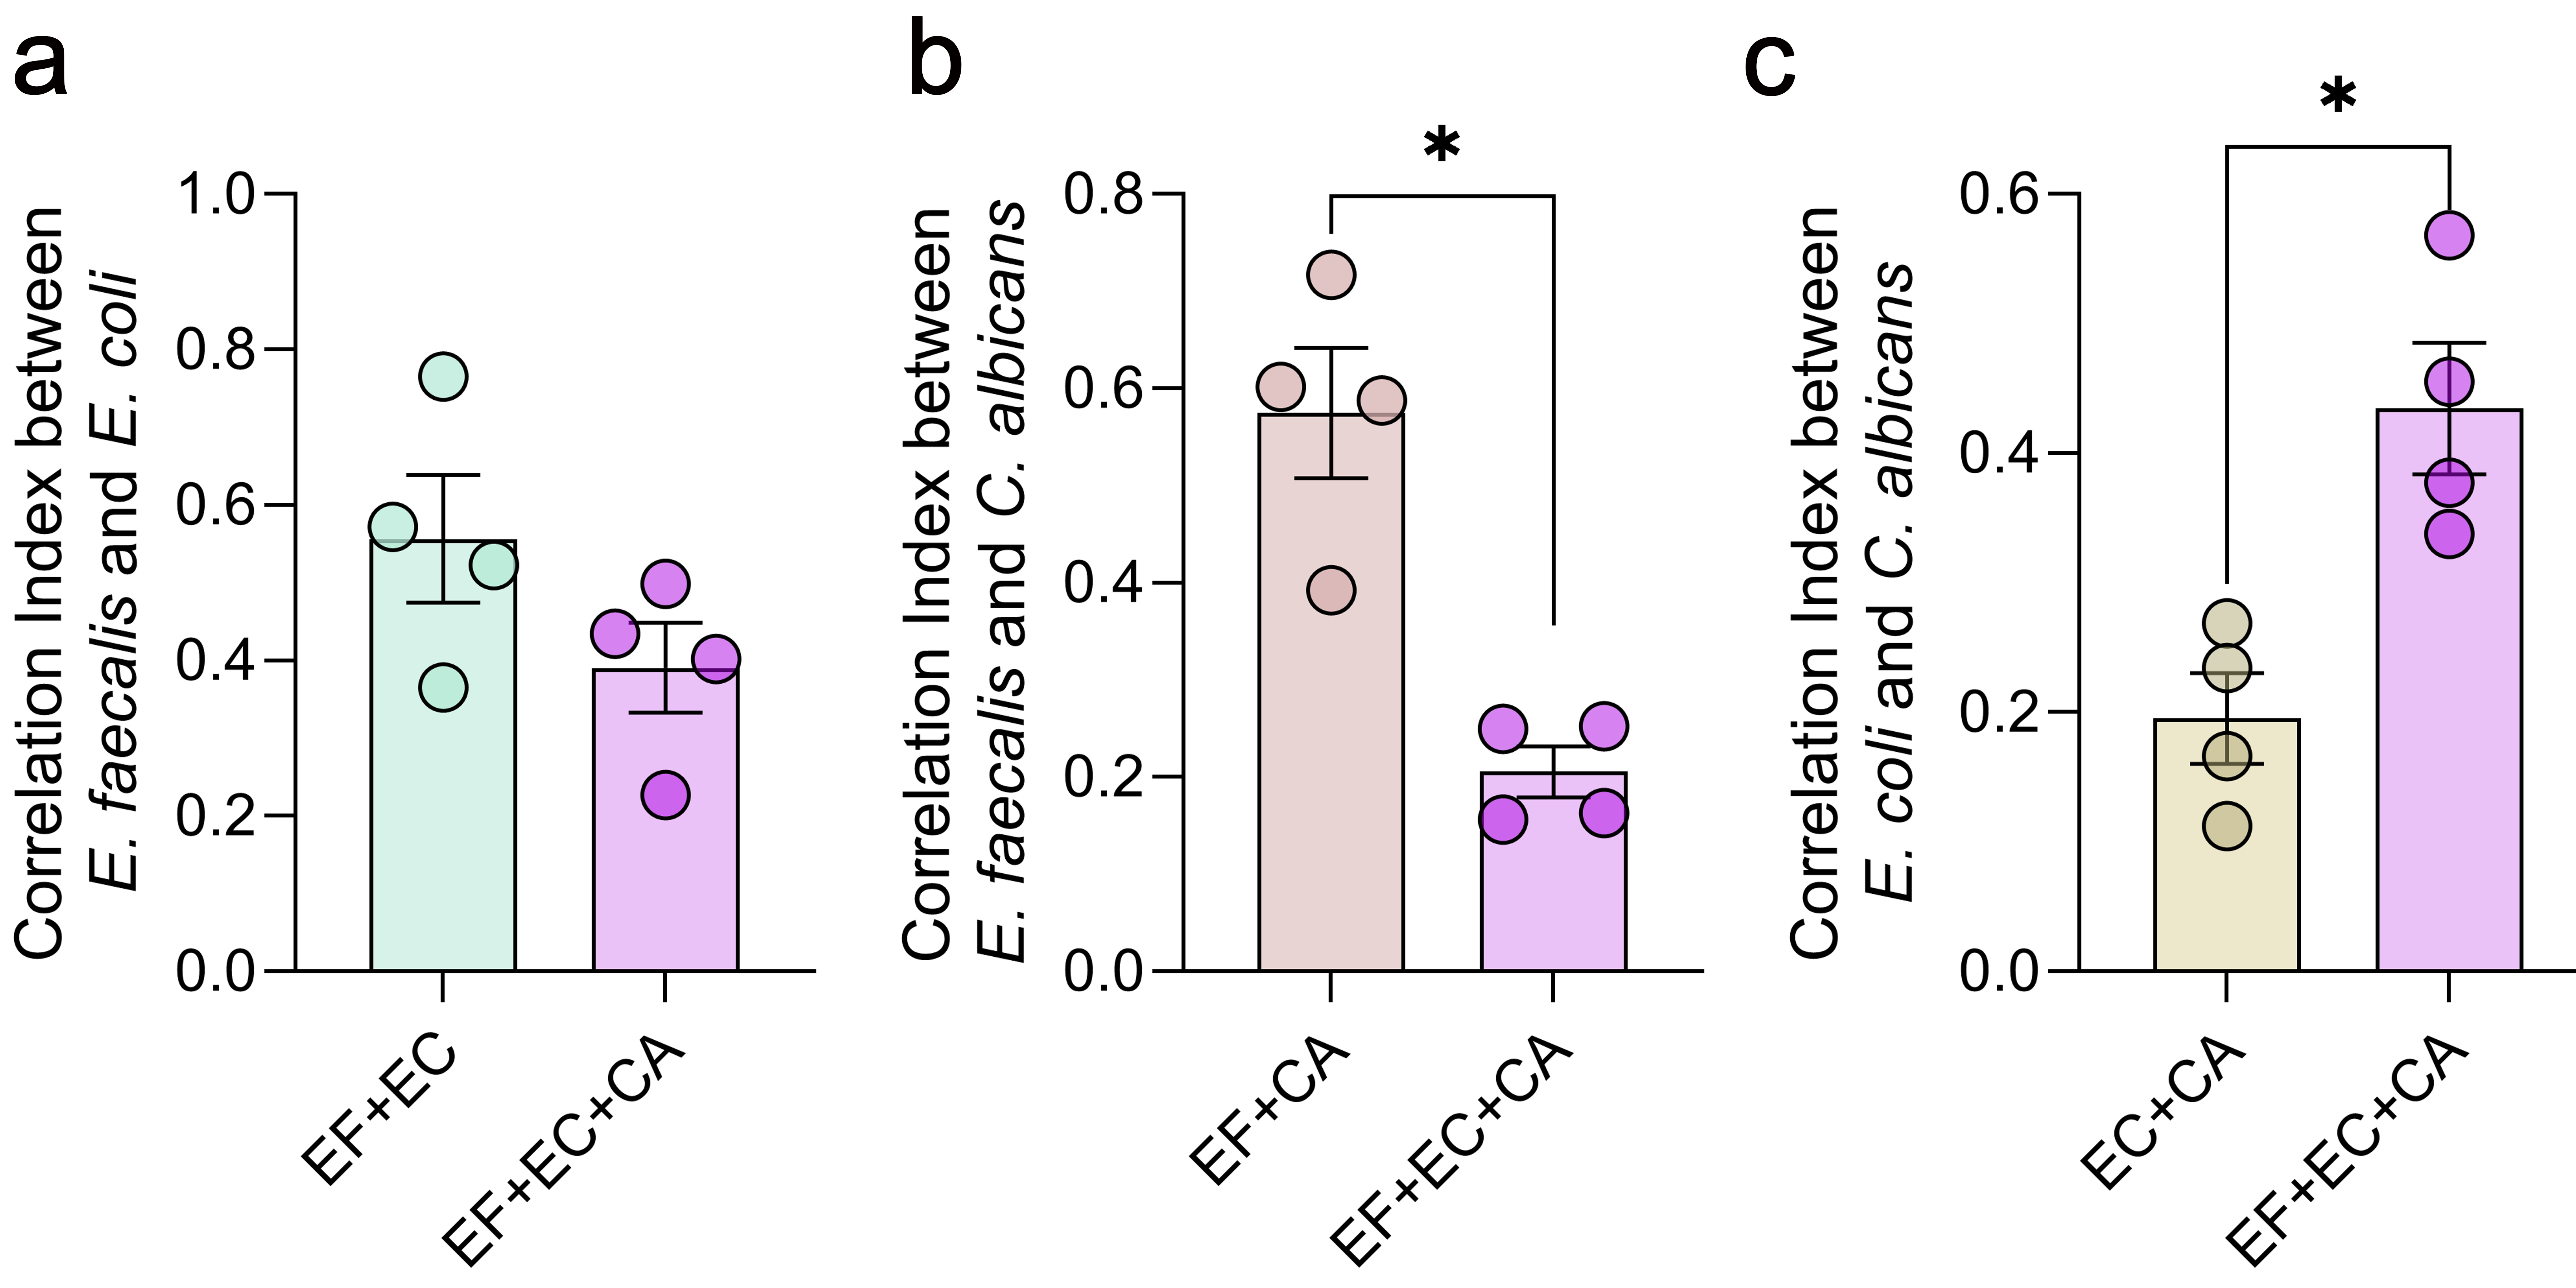


**Extended Data Figure 5. Colocalization between *E. coli* and *C. albicans* increases in the bladder during triple-species co-infections.** (**a-c**) Index of Correlation was quantified using Colocalization Colormap plugin on ImageJ based on three different bladder images of three days post catheterization and infection for each condition. Statistical analysis was performed using Mann-Whitney U test (P < 0.05; **, P < 0.005; ***, P < 0.0005; and ****, P < 0.0001).

**
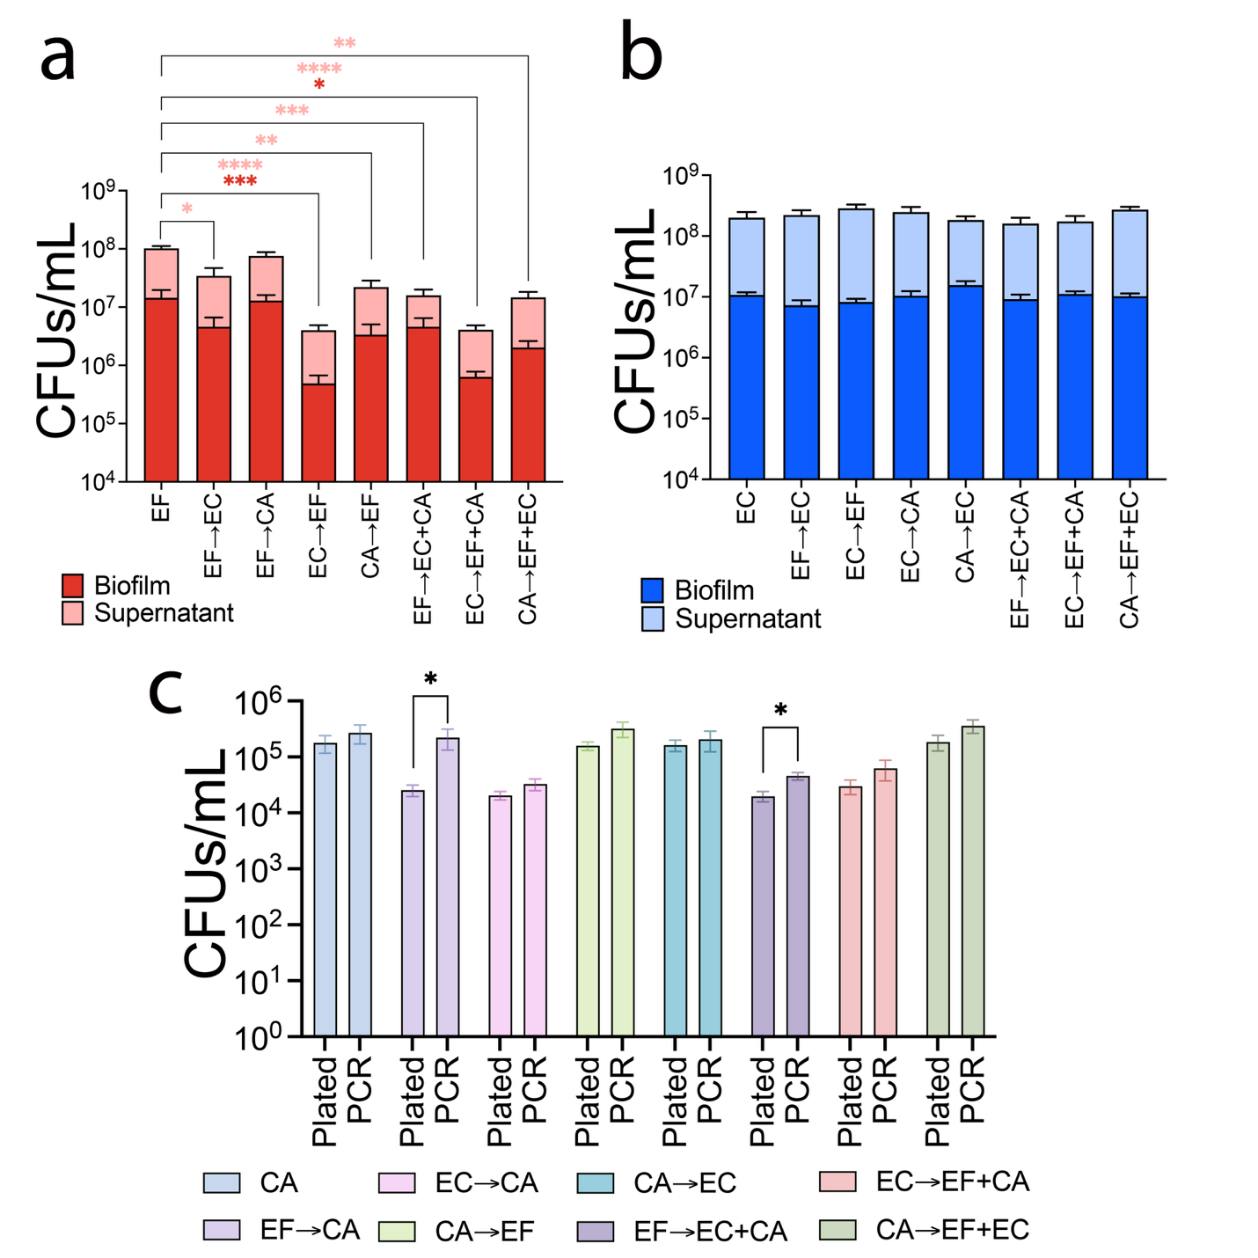
Extended Data Figure 6. The order in which the biofilm grow is crucial for *E. faecalis,* but not *E. coli.*** Sequential biofilms of *E. faecalis* **(a)**and *E. coli* **(b)**were grown for 48 hours (24 + 24 hours).(**x→y)** x represents microorganism grown in the first 24 hours and y represents microorganism grown in the next 24 hours. Statistical analysis was done using Mann-Whitney U test (P < 0.05; **, P < 0.005; ***, P < 0.0005; and ****, P < 0.0001). **(c)** Plated samples are the same CFUs as biofilm results in **Fig. 5a,b** for *C. albicans* and in **Extended Data Figure 5a** for *E. faecalis,* and **Extended Data Figure 5b** for *E. coli***.** PCR data were obtained by extracting DNA from the sonicated samples of *C. albicans* biofilms and used them for qPCR. *C. albicans* strain that is unable to form hyphae, *efg1*Δ/Δ, was used as a standard for the qPCR and CFUs. ITS2 housekeeping gene was used as a reference for the quantification of cells.

**
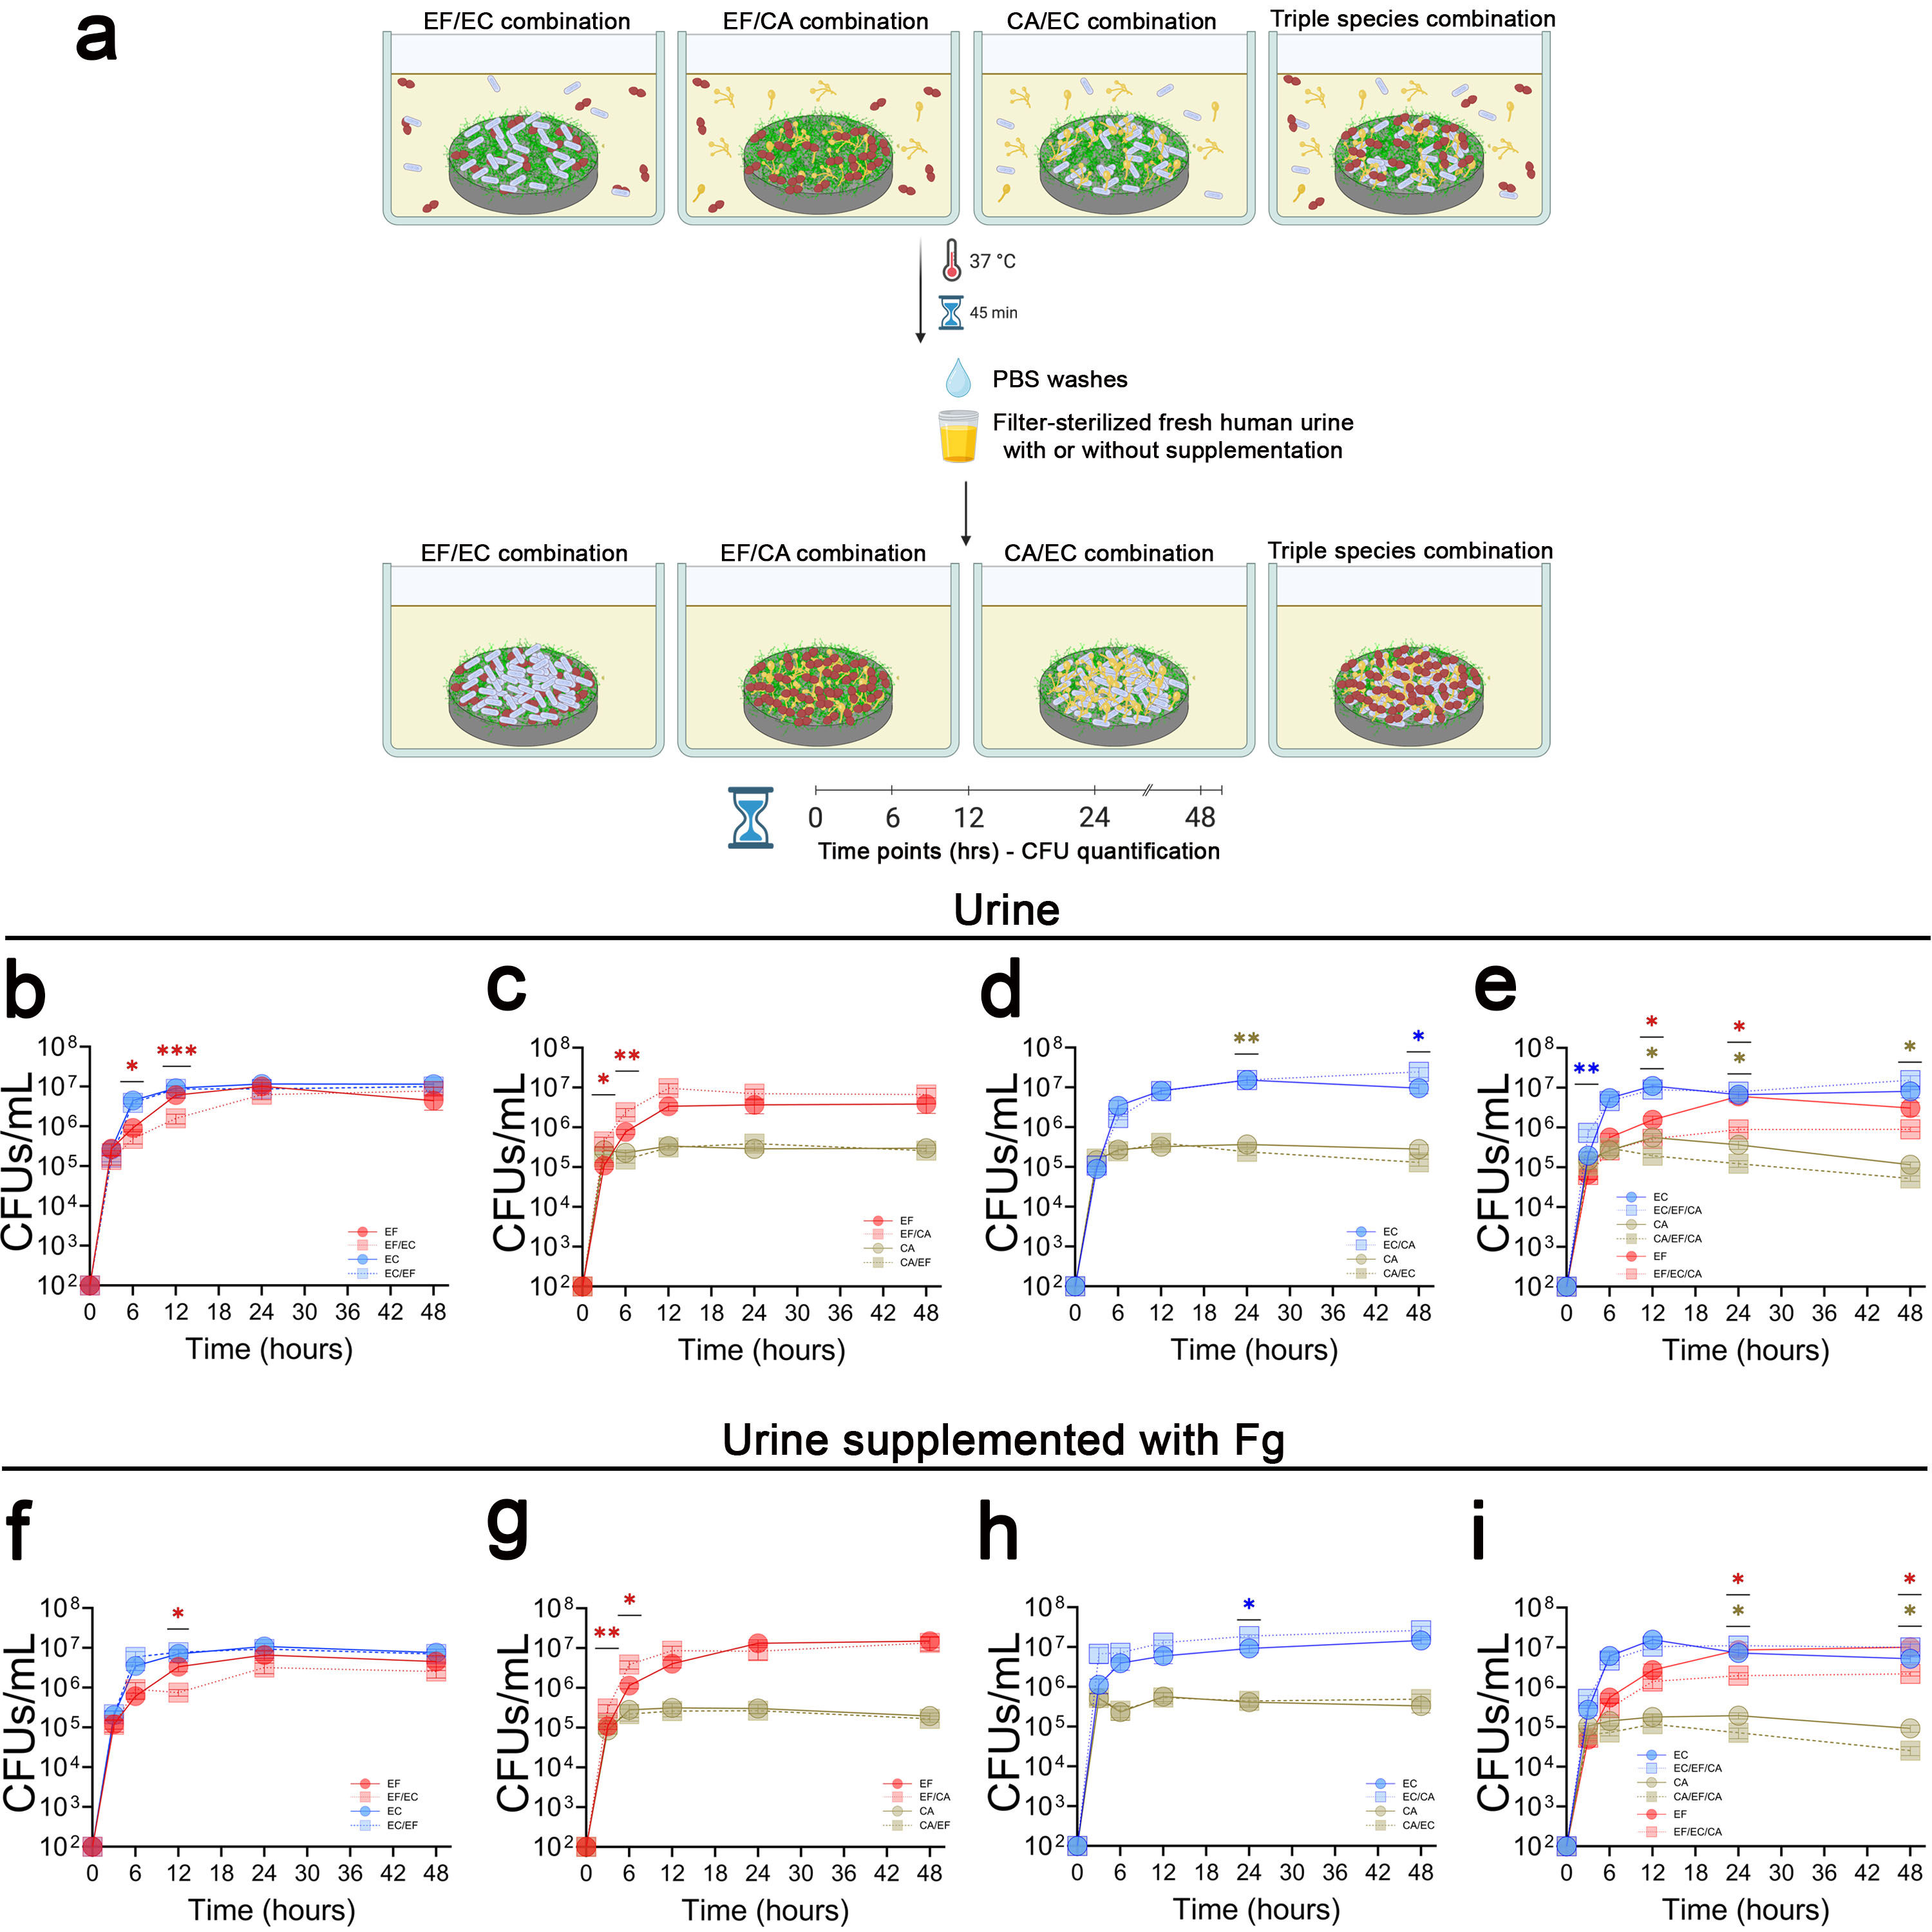
**

**Extended Data Figure 7. *C. albicans* and *E. faecalis* compete with *E. coli* for adherence and higher inoculum with washes gave *C. albicans* and *E. faecalis* better chance at competing with *E. coli.* (a)** Biofilms were form on silicone disks, similar to **Fig. 1** and **Extended Data Fig. 1**, but with 10x the inoculum. After 45 minutes, biofilms were washed, and fresh urine were added to the wells. Biofilms were plated at different time points (0, 6, 12, 24, and 48 hours) to measure CFUs. **(b, c, d, e)** were grown in human urine and **(f, g, h, i)** were grown in human urine + Fibrinogen (Fg). Differences within each time points were tested for significance using the Mann-Whitney U test. *, P < 0.05; **, P < 0.005; ***, P < 0.0005; and ****, P < 0.0001. P-value colors represent the comparison between the different species: *E. faecalis* (red), *E. coli* (blue), and *C. albicans* (yellow).

**
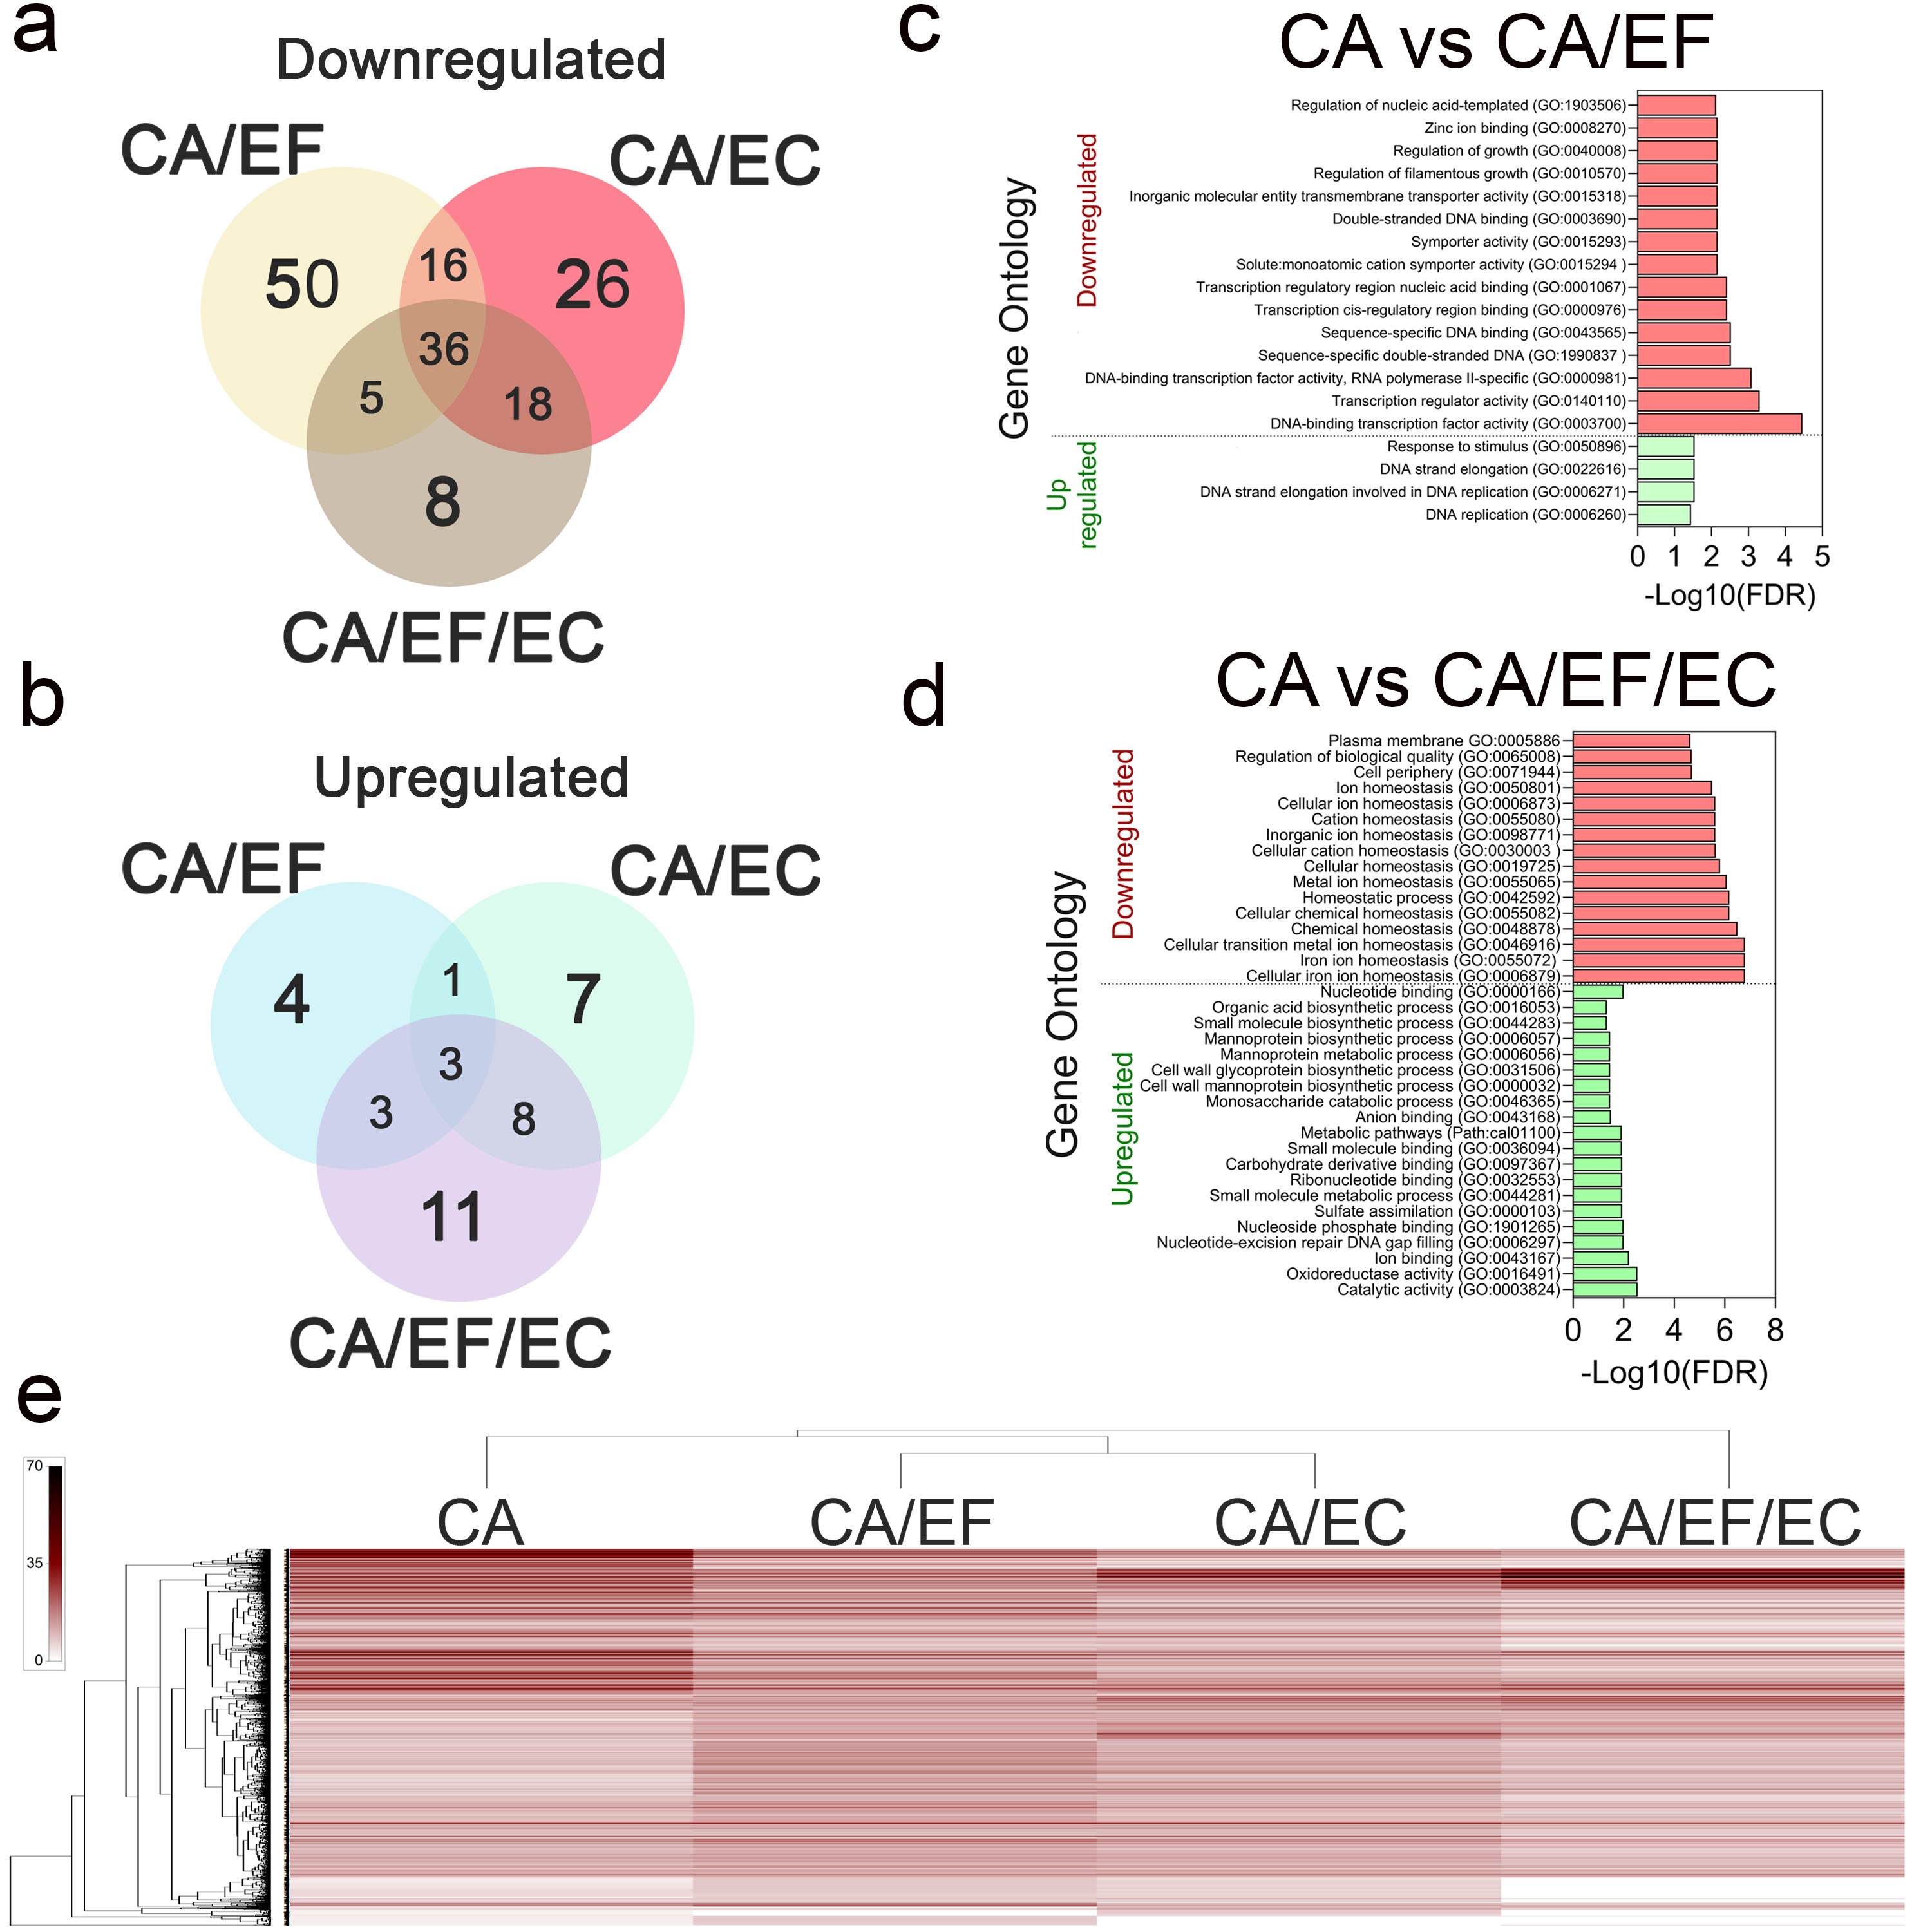
Extended Data Figure 8. *C. albicans t*ranscriptomic profiles are different in mono- vs. polymicrobial biofilms. (a)** Downregulated and **(b)** upregulated genes in *C. albicans* in polymicrobial biofilms compared to *C. albicans* monomicrobial biofilms. **(c)** Gene ontology of downregulated and upregulated *C. albicans* genes in *C. albicans-E. faecalis* co-biofilms. **(d)** Gene ontology of downregulated and upregulated *C. albicans* genes in triple-species biofilms (*C. albicans-E. faecalis-E. coli*). **(e)** Heat map of all differentially regulated genes of *C. albicans* in single, double, triple species biofilms. Venn diagrams were made using Evenn (ehbio.com). Gene Ontology graphs were made using ShinyGO and GraphPad Prism. Heatmaps were made using PRIMER 7 software.


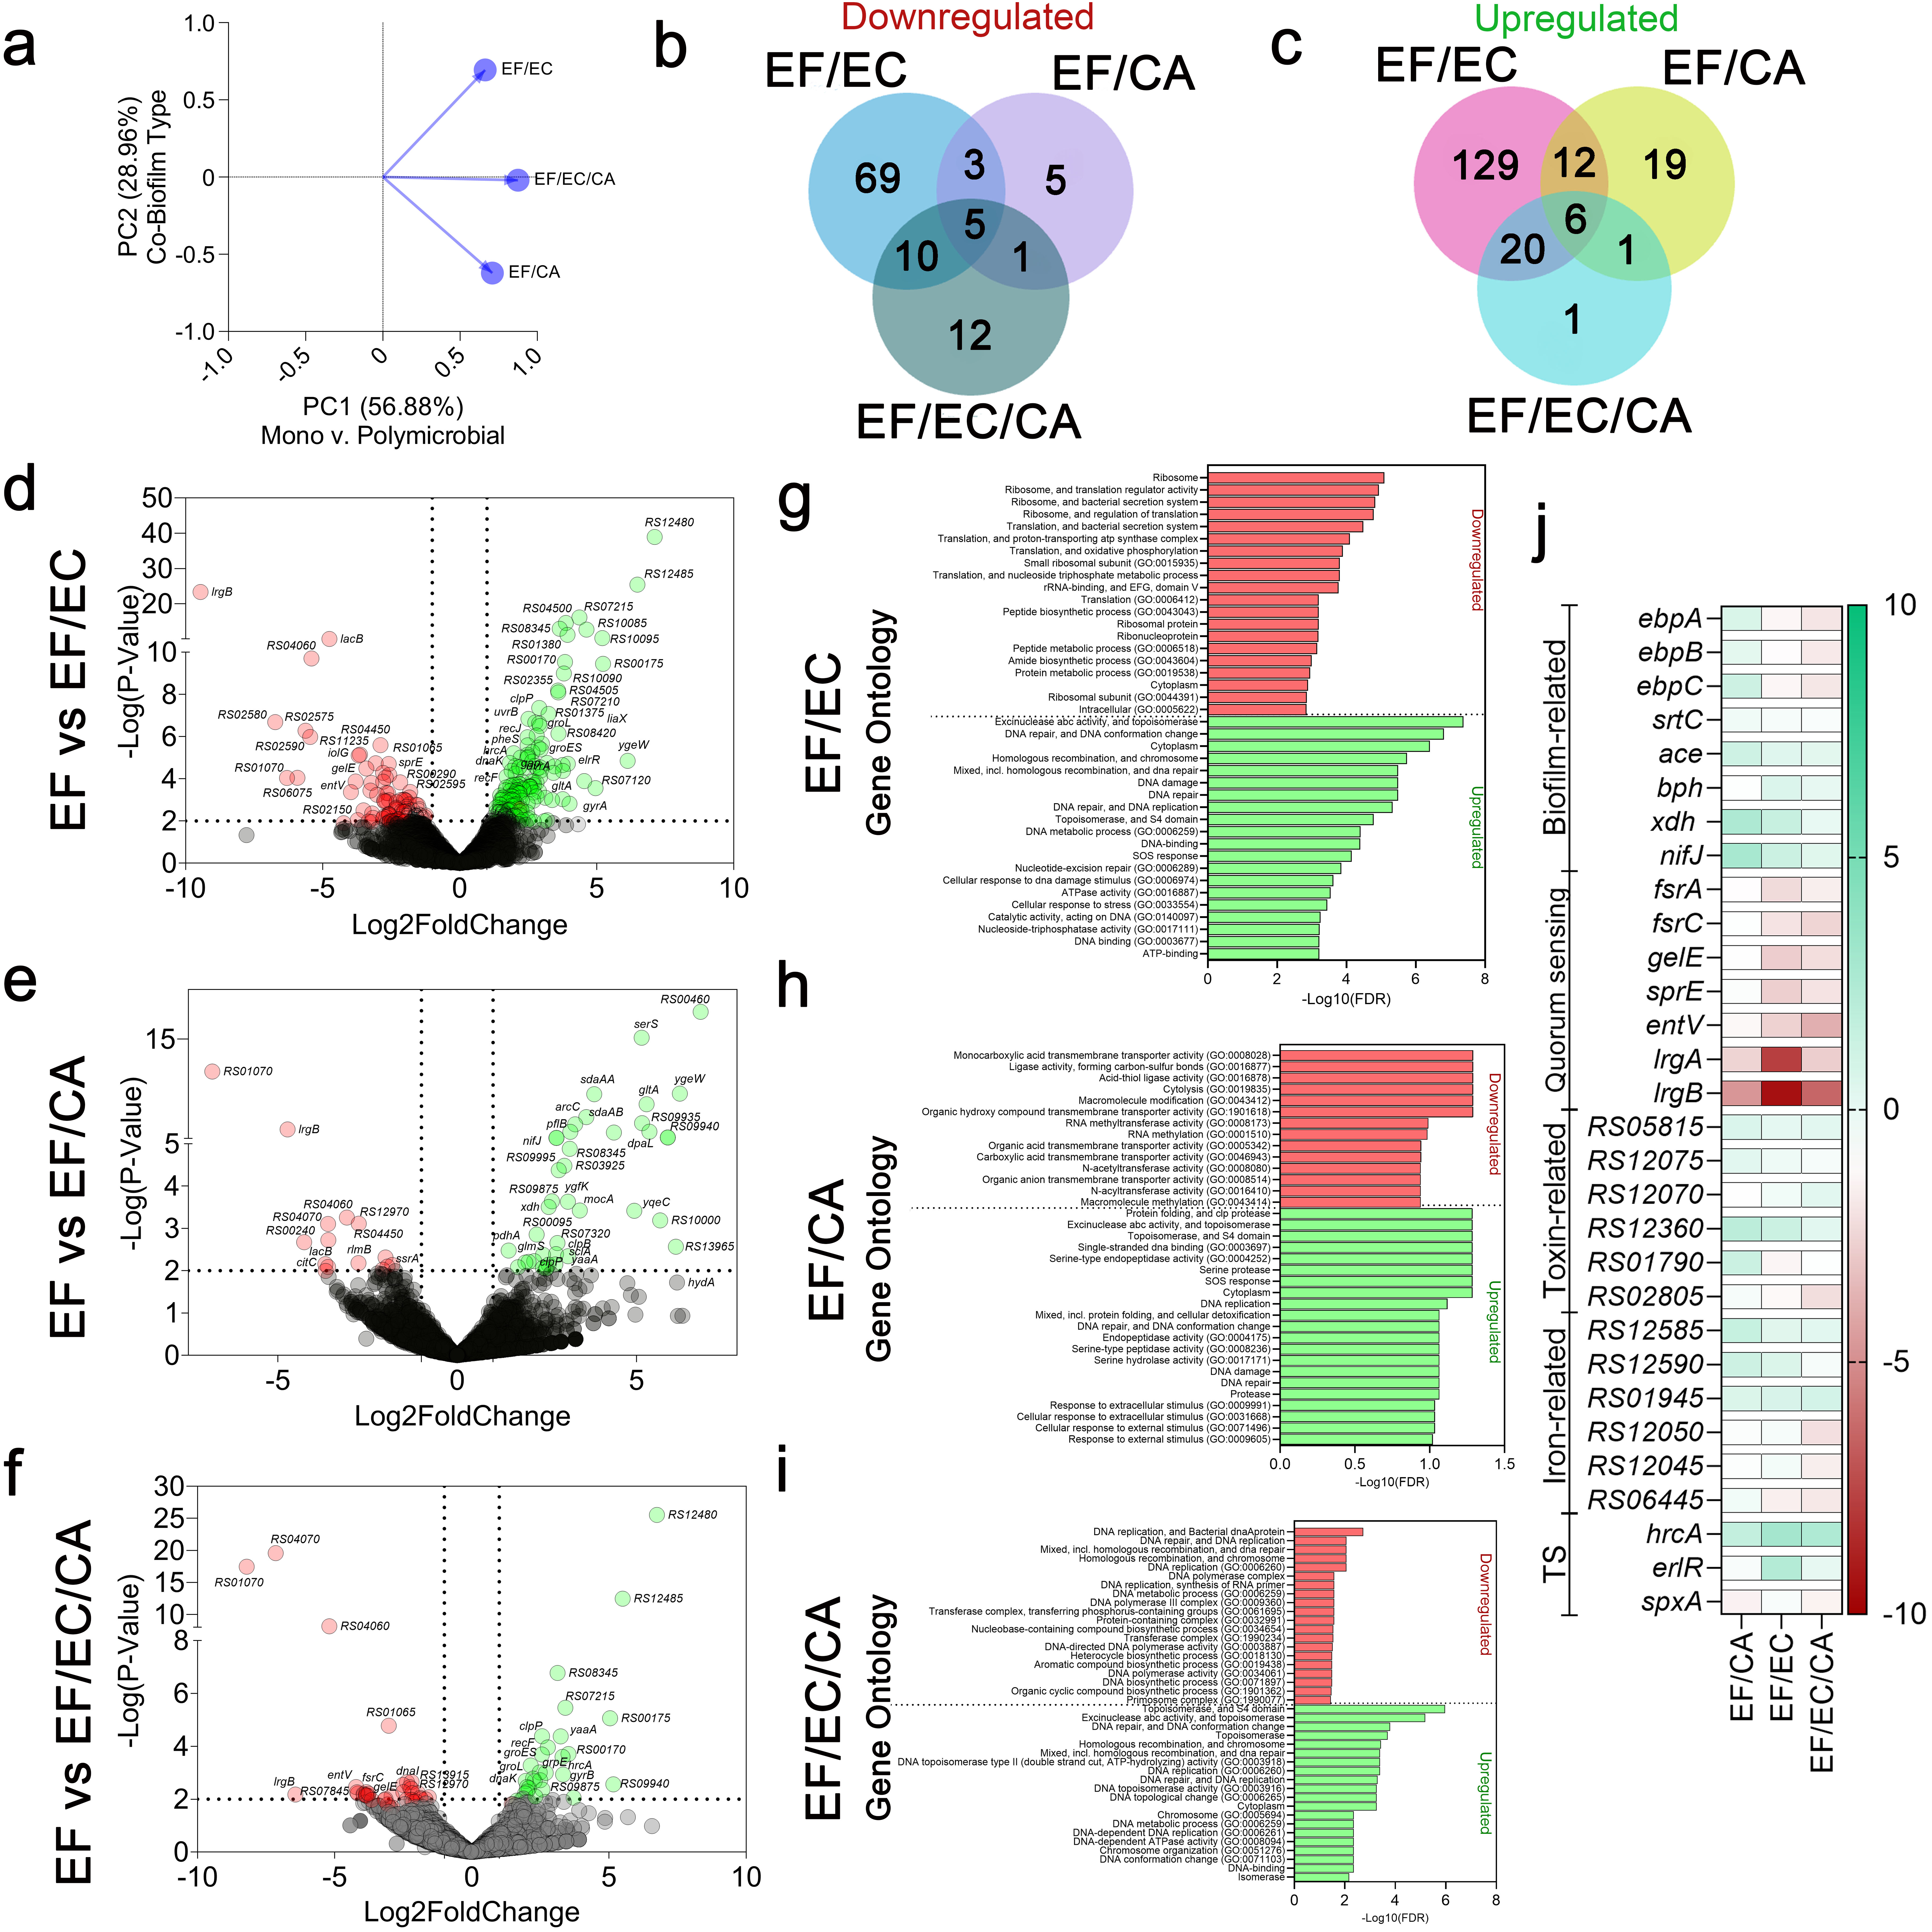


**Extended Data Figure 9. *E. faecalis t*ranscriptomic profiles are different in mono- vs. polymicrobial biofilms. (a)** PCA plot of *E. faecalis* gene expressions in polymicrobial biofilms. **(b)** Downregulated and **(c)** upregulated genes in *E. faecalis* in polymicrobial biofilms compared to *E. faecalis* monomicrobial biofilms. **(d-f)** Volcano plots of differentially regulated genes of *E. faecalis* during co-biofilms with *E. coli* (EF/EC) **(d)**, *E. coli* (EF/CA) **(e)**, or both (EF/EC/CA) **(f)**in comparison with *E. faecalis* biofilms. Blue represents downregulated genes and red represents upregulated genes with a cutoff of 2 in -log(p-value) and 1 in log2foldchange. **(g)** Gene ontology of downregulated and upregulated*E. faecalis* genes in *E. faecalis-E. coli* co-biofilms. **(h)** Gene ontology of downregulatedand upregulated *E. faecalis* genes in *E. faecalis-C. albicans* co-biofilms. **(i)** Gene ontology of downregulated and upregulated *E. faecalis* genes in triple-species biofilms (*E. faecalis-E. coli-C. albicans*). Venn diagrams were made using Evenn (ehbio.com). PCA plots and Gene Ontology graphs were made using ShinyGO and GraphPad Prism. **(j)** Heat map showing differential expression of *E. faecalis* virulence genes in co-culture biofilms.


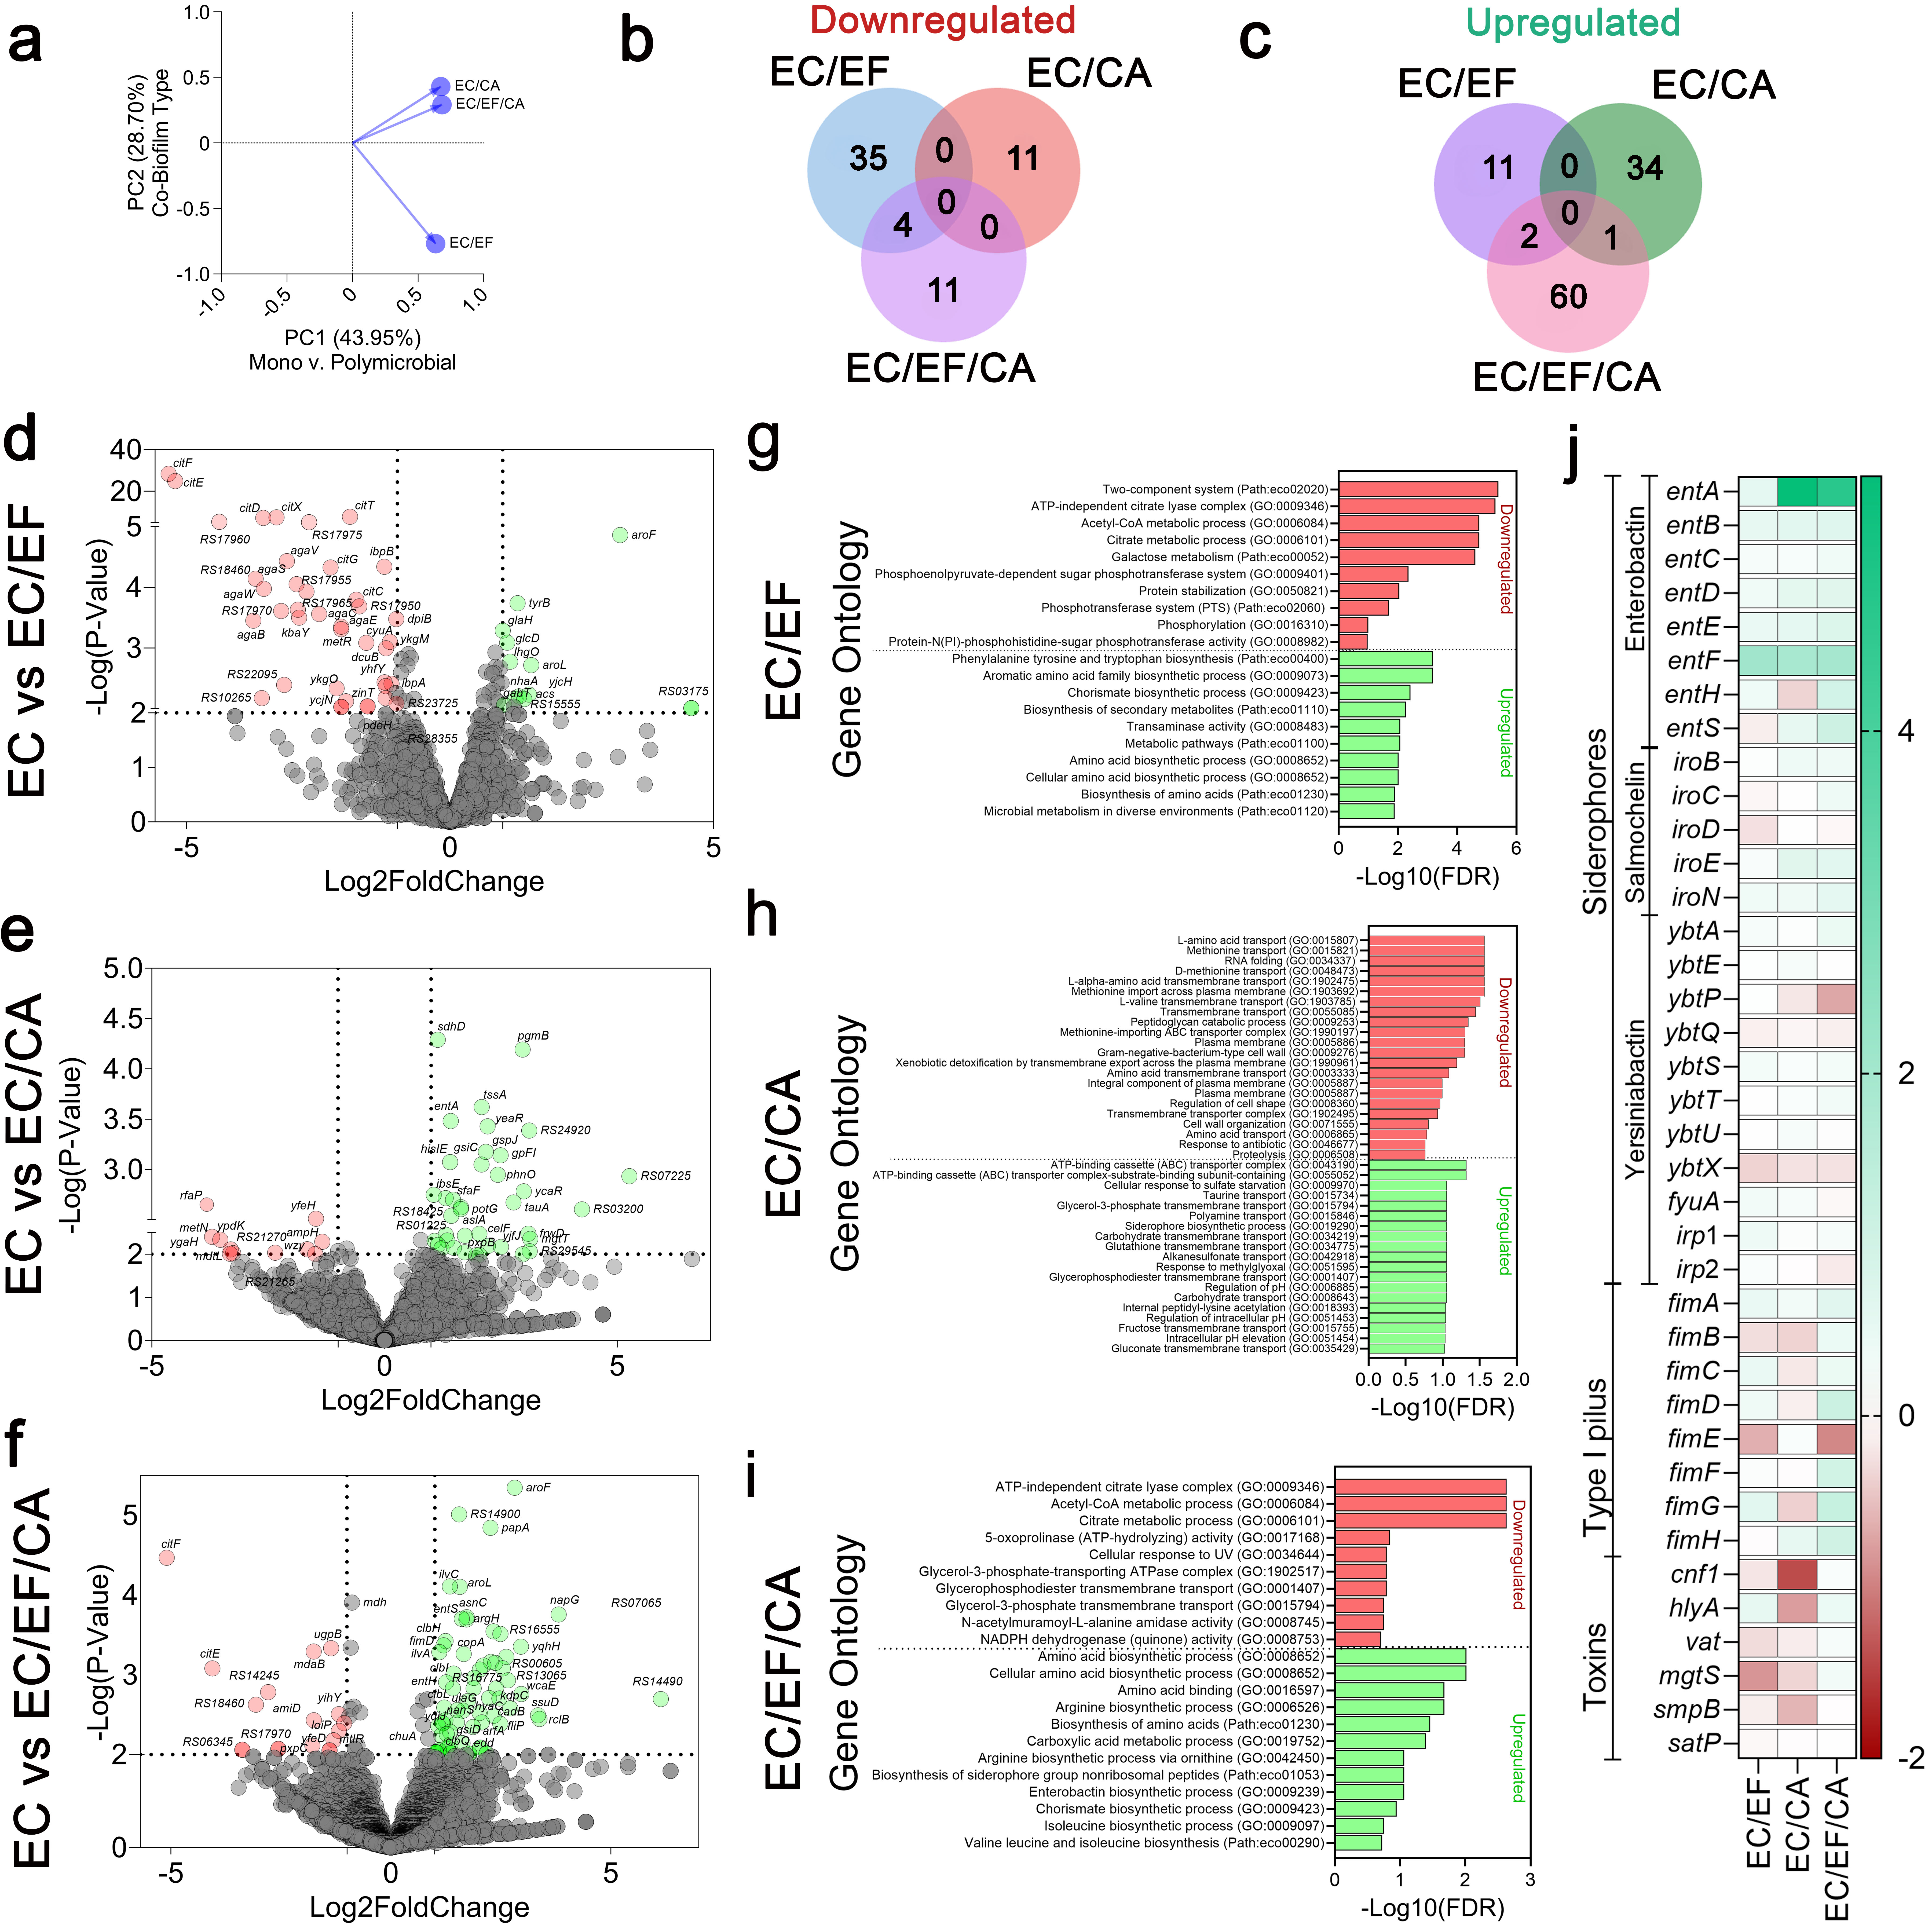


**Extended Data Figure 10. *E. coli t*ranscriptomic profiles are different in mono- vs. polymicrobial biofilms. (a)** PCA plot of *E. coli* gene expressions in polymicrobial biofilms. **(b)** Downregulated and **(c)** upregulated genes in *E. coli* in polymicrobial biofilms compared to *E. coli* monomicrobial biofilms. **(d-f)** Volcano plots of differentially regulated genes of *E. coli* during co-biofilms with *E. faecalis* (EC/EF) **(d)**, *C. albicans* (EC/CA) **(e)**, or both (EC/EF/CA) **(f)**in comparison with *E. coli* biofilms. Blue represents downregulated genes and red represents upregulated genes with a cutoff of 2 in -log(p-value) and 1 in log2foldchange. **(g)** Gene ontology of downregulated and upregulated*E. coli* genes in *E. coli-E. faecalis* co-biofilms. **(h)** Gene ontology of downregulatedand upregulated *E. coli* genes in *E. coli-C. albicans* co-biofilms. **(i).** Gene ontology of downregulated and upregulated *E. coli* genes in triple-species biofilms (*E. coli-E. faecalis-C. albicans*). Venn diagrams were made using Evenn (ehbio.com). PCA plots and Gene Ontology graphs were made using ShinyGO and GraphPad Prism. **(j)** Heat map showing differential expression of *E. coli* virulence genes in co-culture biofilms.
